# Supplementary material for: Identification of Cardiovascular Disease-Related Genes Based on the Co-Expression Network Analysis of Genome-Wide Blood Transcriptome
Source: MDPI journal article supplement (doi:10.3390/cells11182867), 2022-09-14
Supplement: s1 [file s1]

# Identification of Cardiovascular Disease-related Genes Based on the Co-expression Network Analysis of Genome-wide Blood Transcriptome (Supplementary Materials)

Taesic Lee<sup>1, 2†</sup>, Sangwon Hwang<sup>3†</sup>, Dong Min Seo<sup>4</sup>, Ha Chul Shin<sup>5</sup>, Hyun Soo Kim<sup>5</sup>,

Jang-Young Kim<sup>6</sup> and Young Uh<sup>7\*</sup>

<sup>1</sup> Division of Data Mining and Computational Biology, Institute of Global Health Care and Development, Wonju Severance Christian Hospital, Wonju 26411, Korea

<sup>2</sup> Department of Family Medicine, Yonsei University Wonju College of Medicine, Wonju, Korea

<sup>3</sup> Artificial Intelligence Bigdata Medical Center, Yonsei University Wonju College of Medicine, Wonju, Korea

<sup>4</sup> Department of Medical Information, Yonsei University Wonju College of Medicine, Wonju, Korea

<sup>5</sup> Pharmicell Co, Ltd, Seongnam, Korea

<sup>6</sup> Department of Internal Medicine, Yonsei University Wonju College of Medicine, Wonju, Korea

<sup>7</sup> Department of Laboratory Medicine, Yonsei University Wonju College of Medicine, Wonju, Korea

<sup>†</sup> These authors have contributed equally to this work.

**\* Correspondence:**

Young Uh

u931018@yonsei.ac.kr

**Supplementary Figure S1.** Module selection based on the differential expression analysis

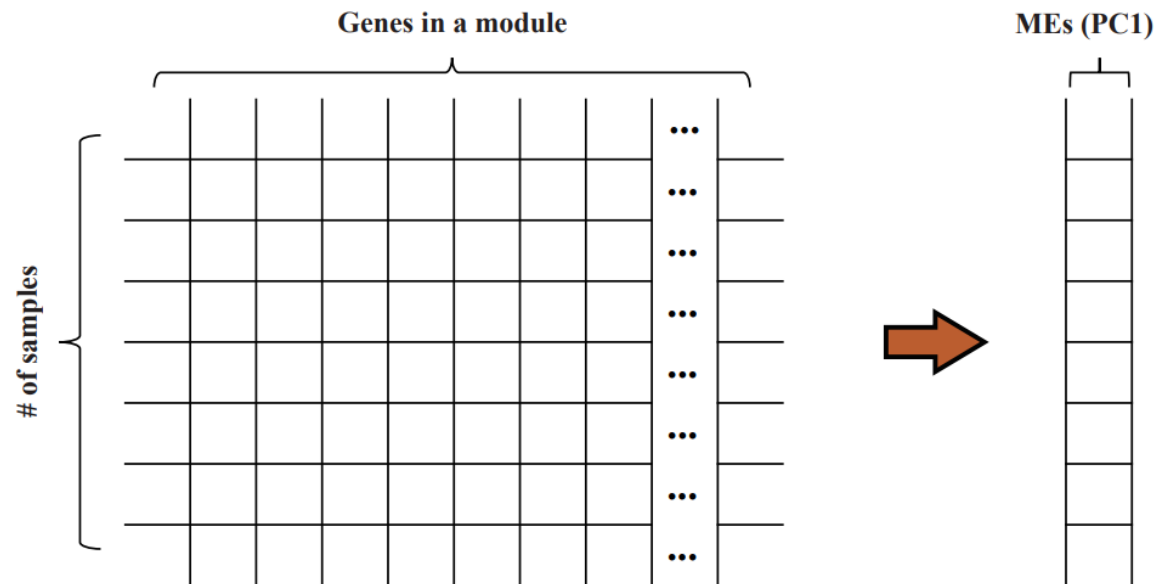

*Linear Regression (MEs ~ disease status<sub>(CVD vs. matched CN)</sub>)*

Supplementary Figure S2. Batch normalization via ComBat method.

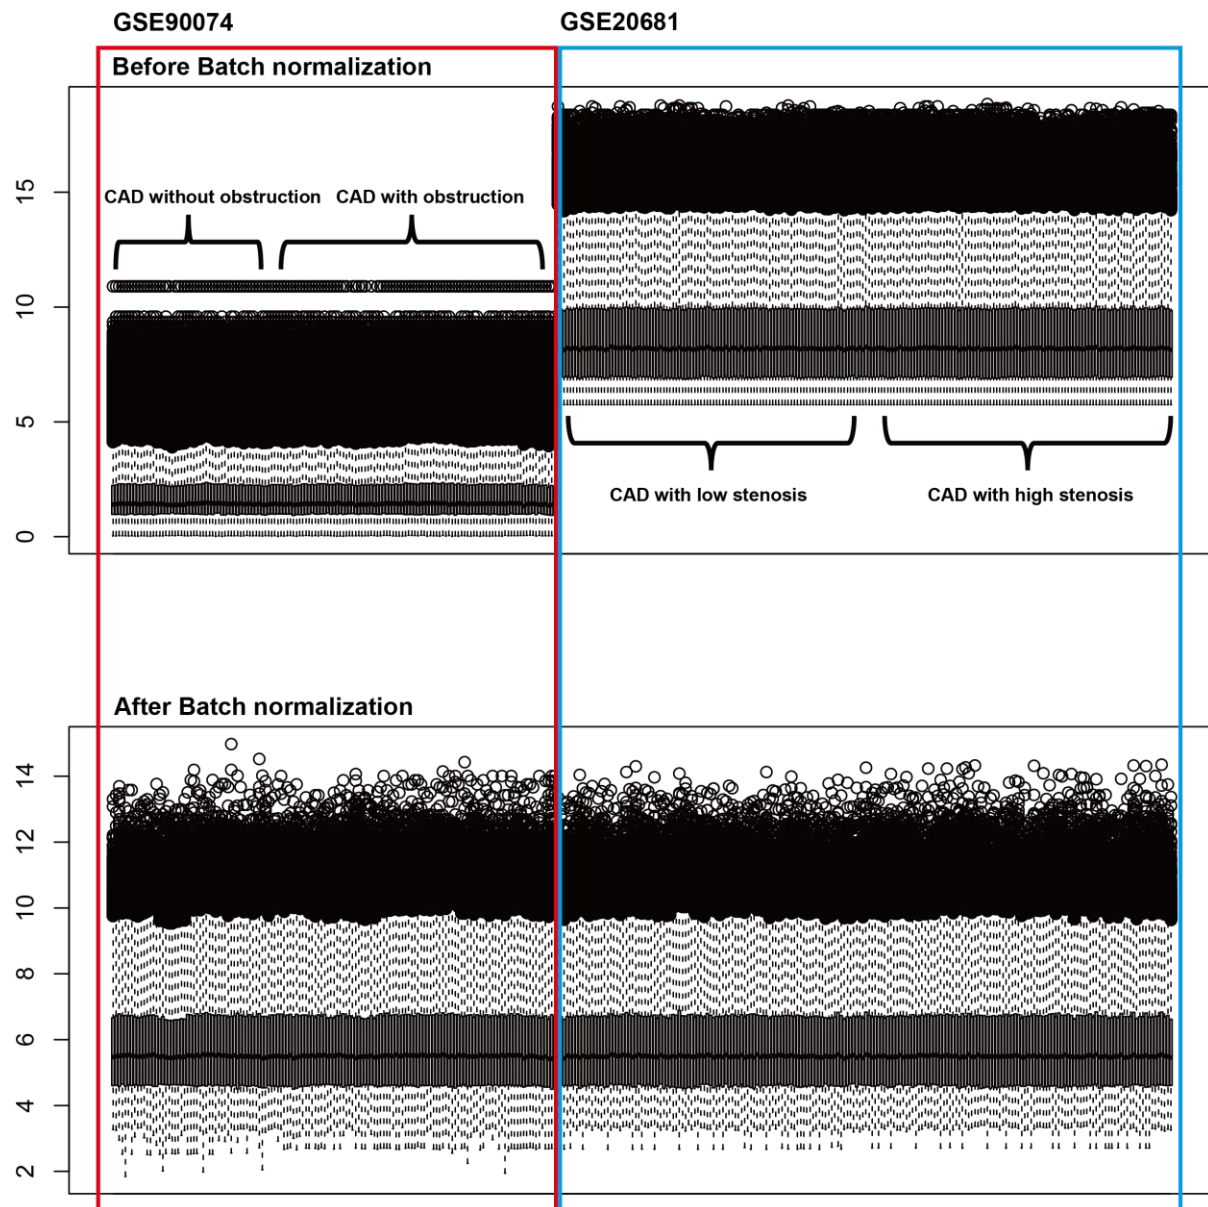

**Supplementary Figure S2.** Batch normalization via ComBat method (continued).

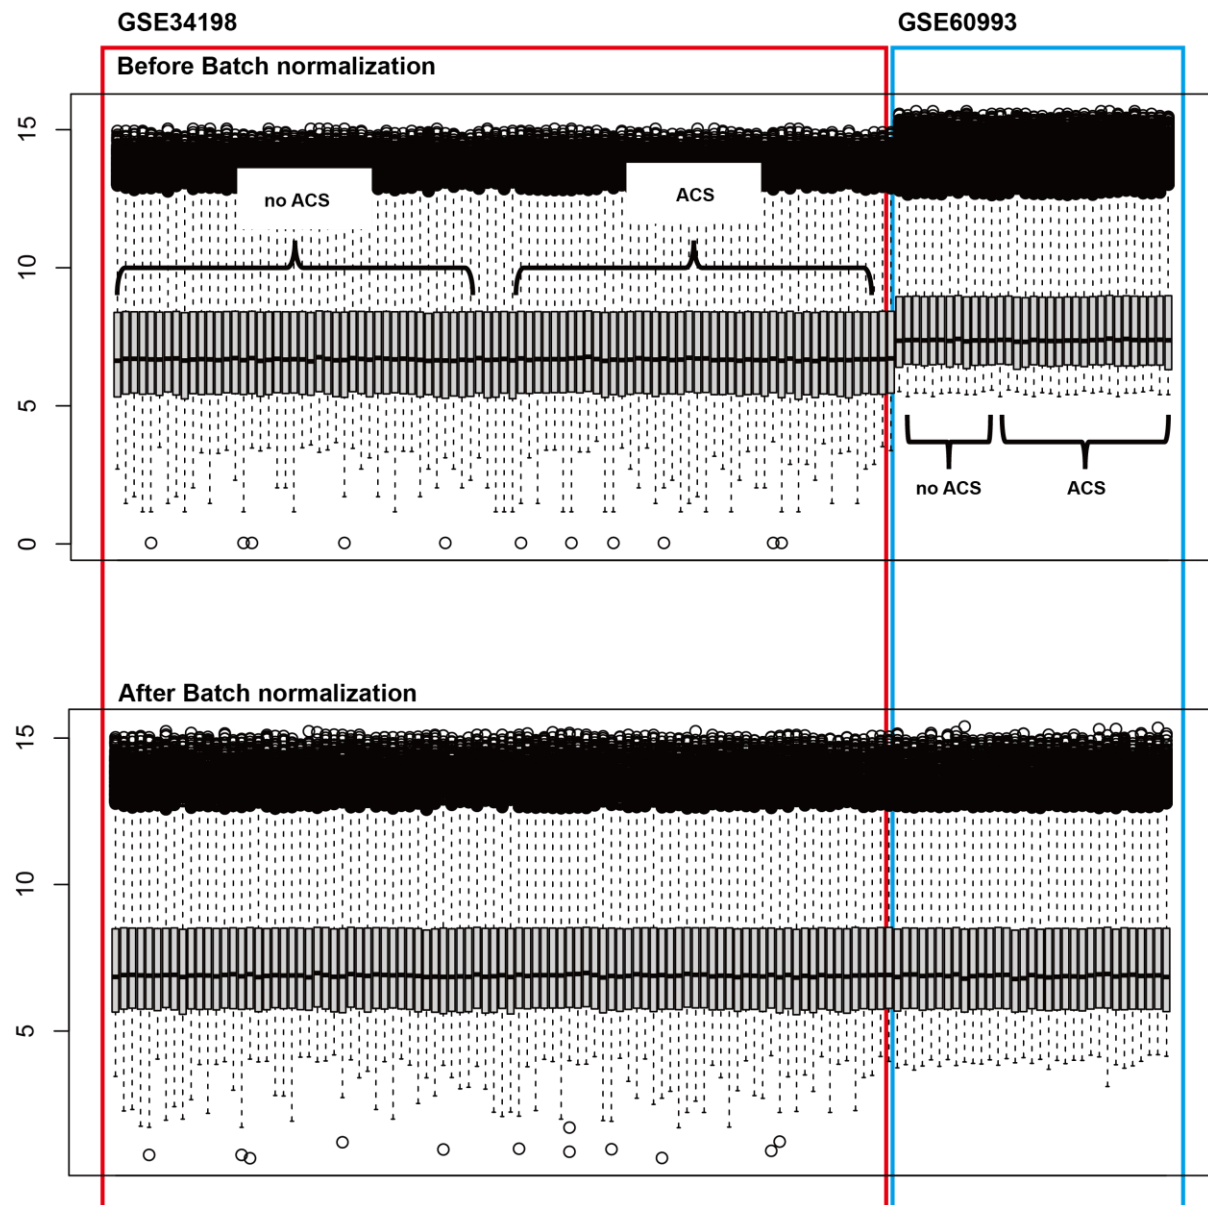

**Supplementary Figure S3.** Selection of soft threshold power for the establishment of adjacency matrix.

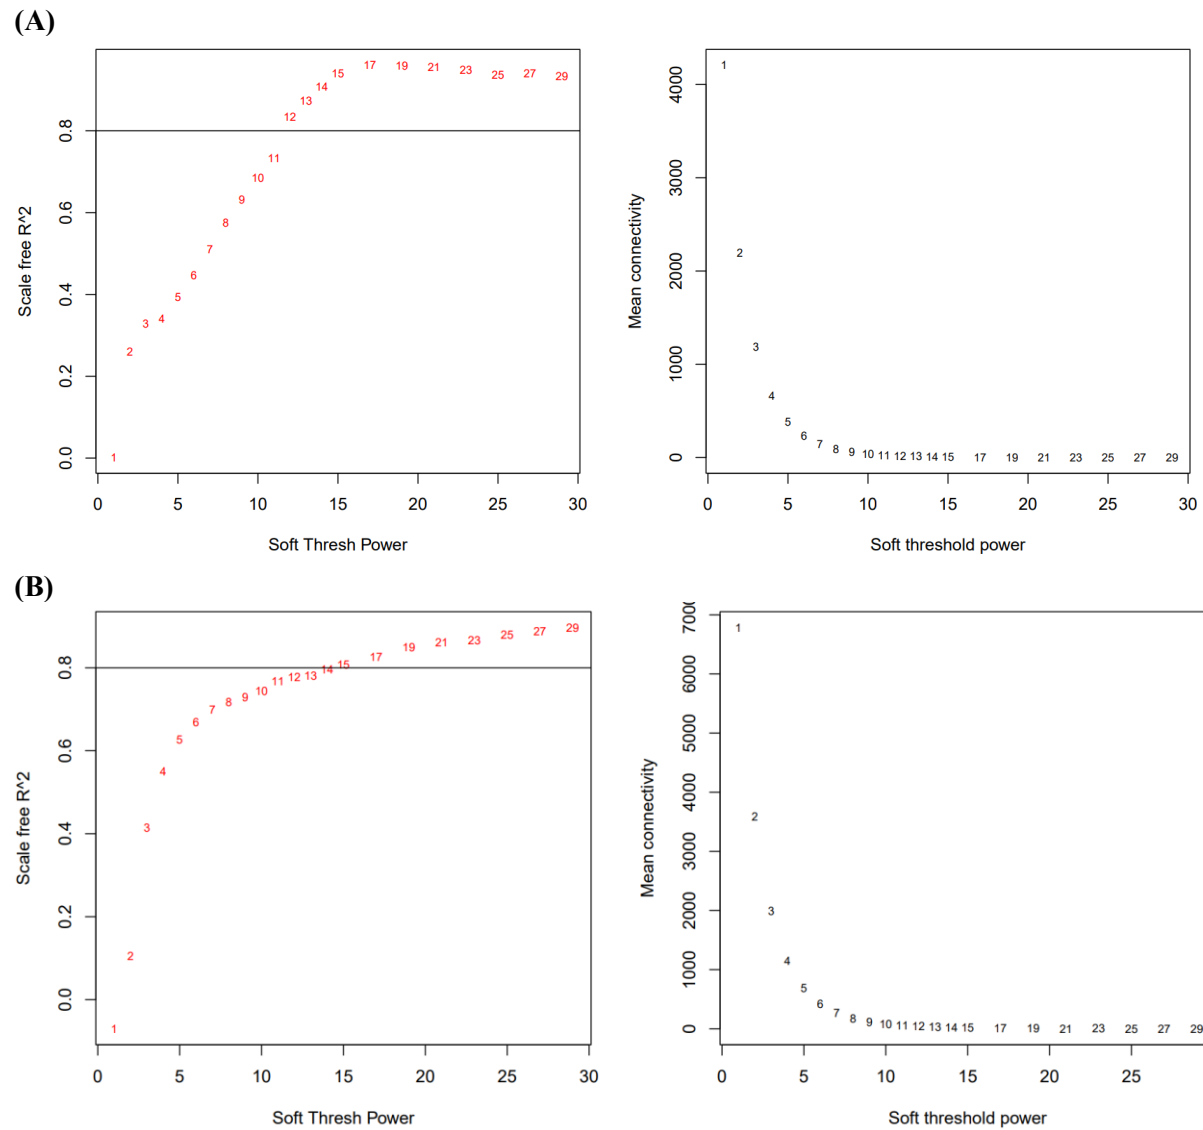

Supplementary Figure S4. Selection of parameters for the construction of module (CAD)

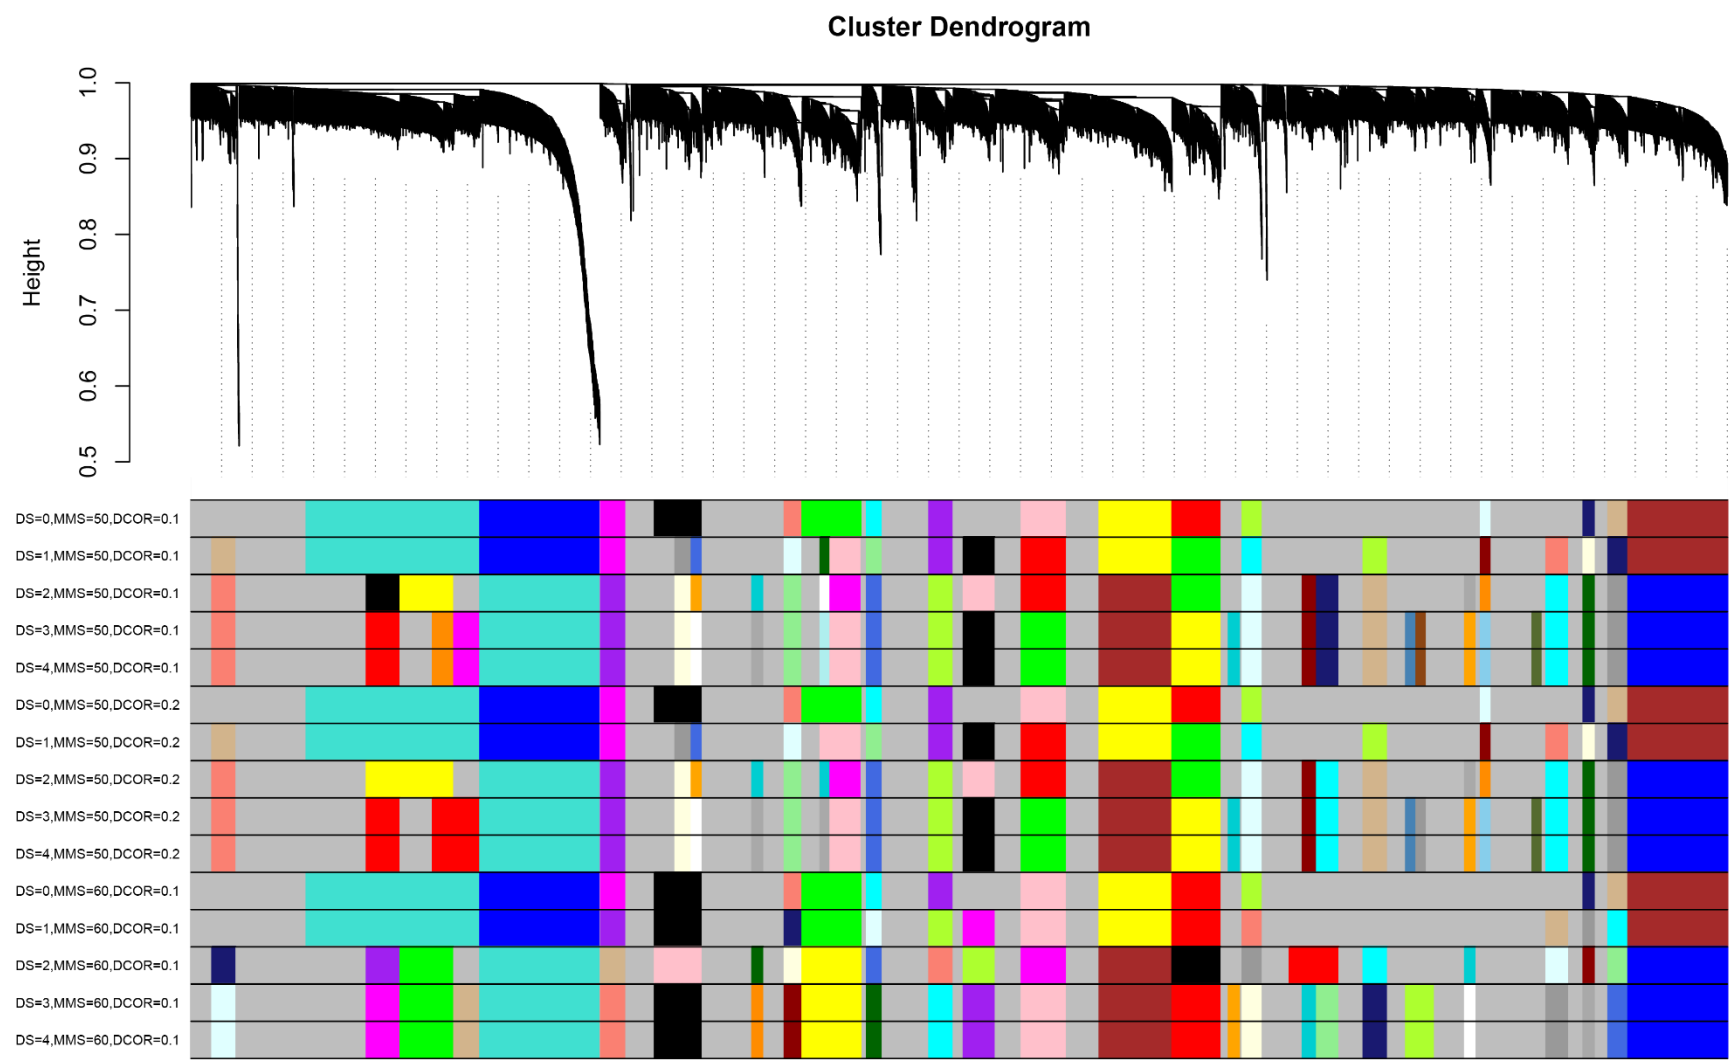

Supplementary Figure S4. Selection of parameters for the construction of module (CAD, Continued)

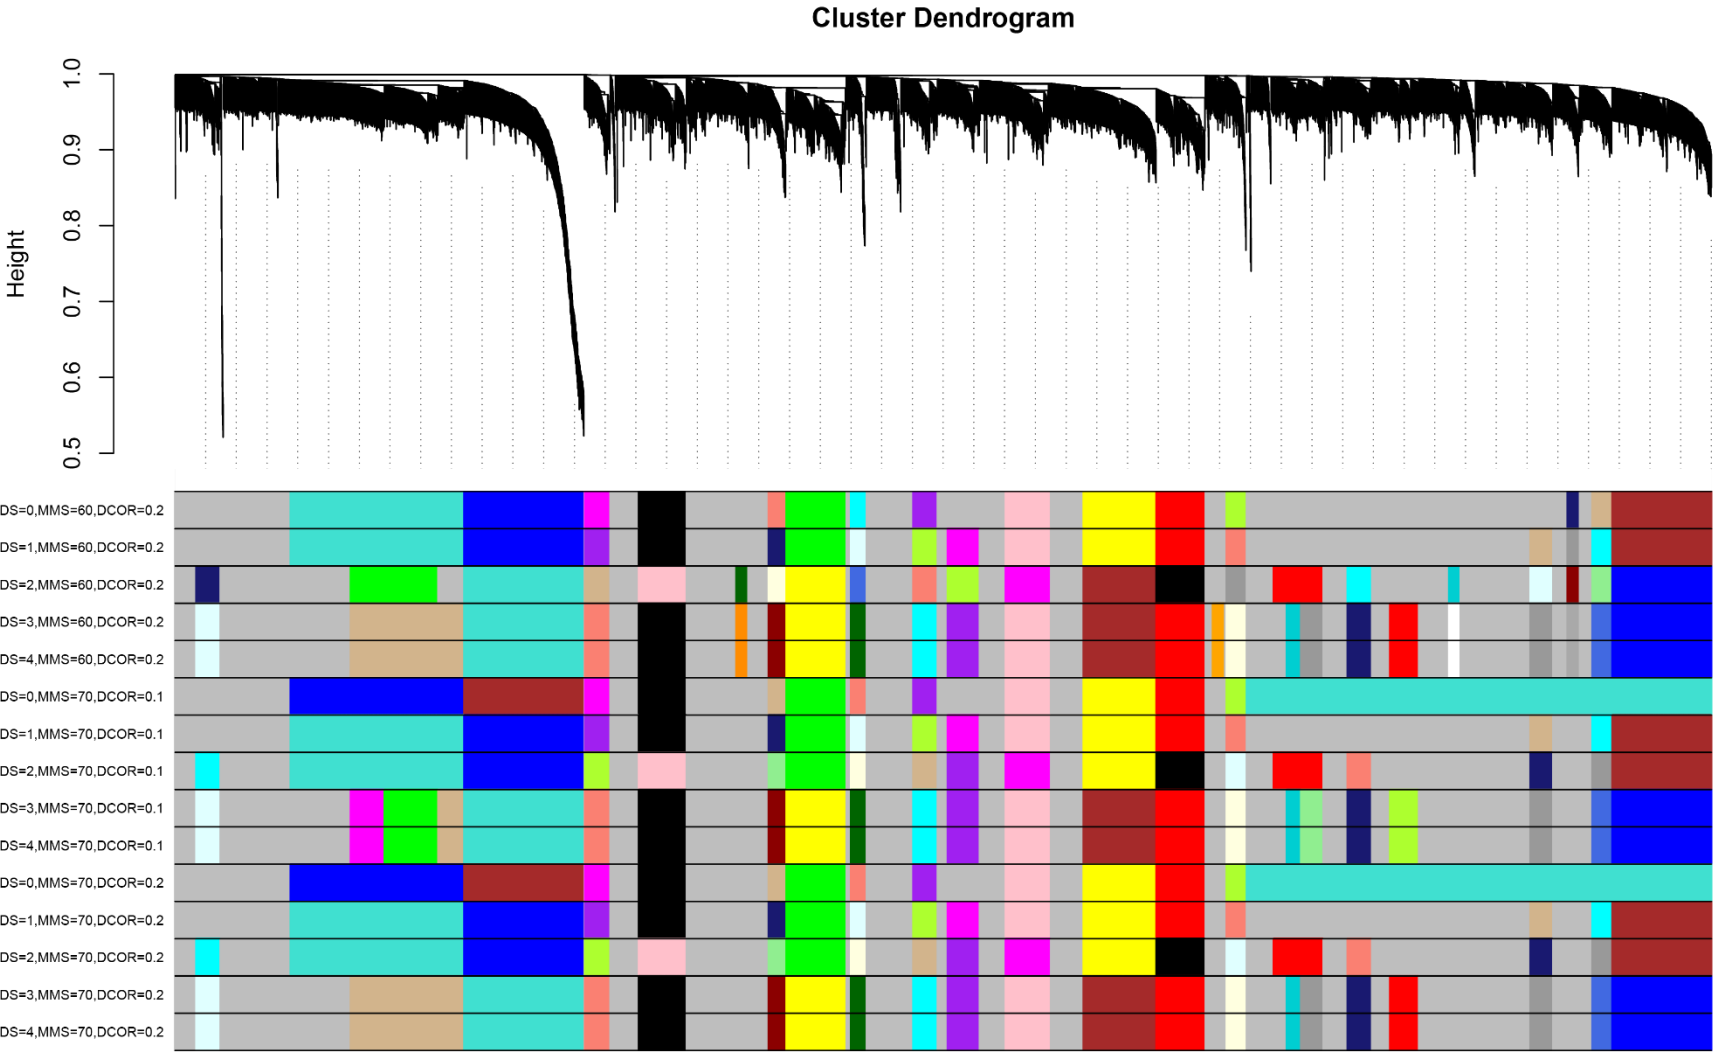

Supplementary Figure S4. Selection of parameters for the construction of module (CAD, Continued)

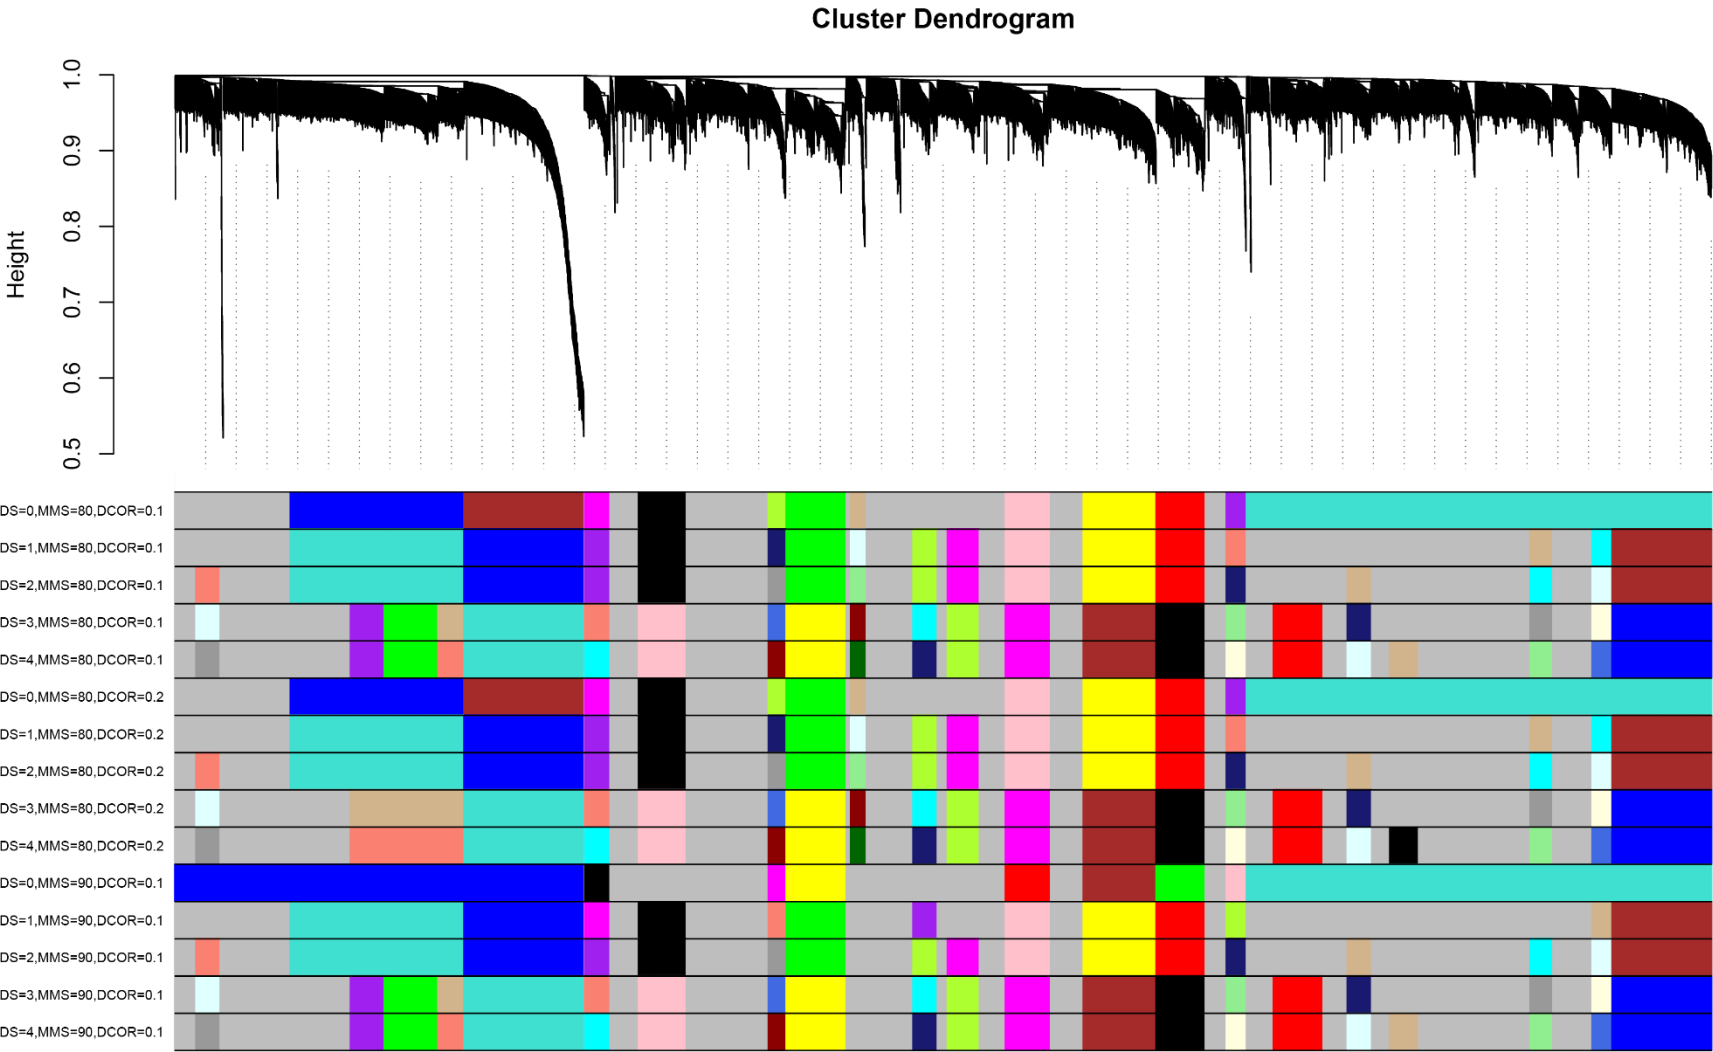



Supplementary Figure S4. Selection of parameters for the construction of module (CAD, Continued)

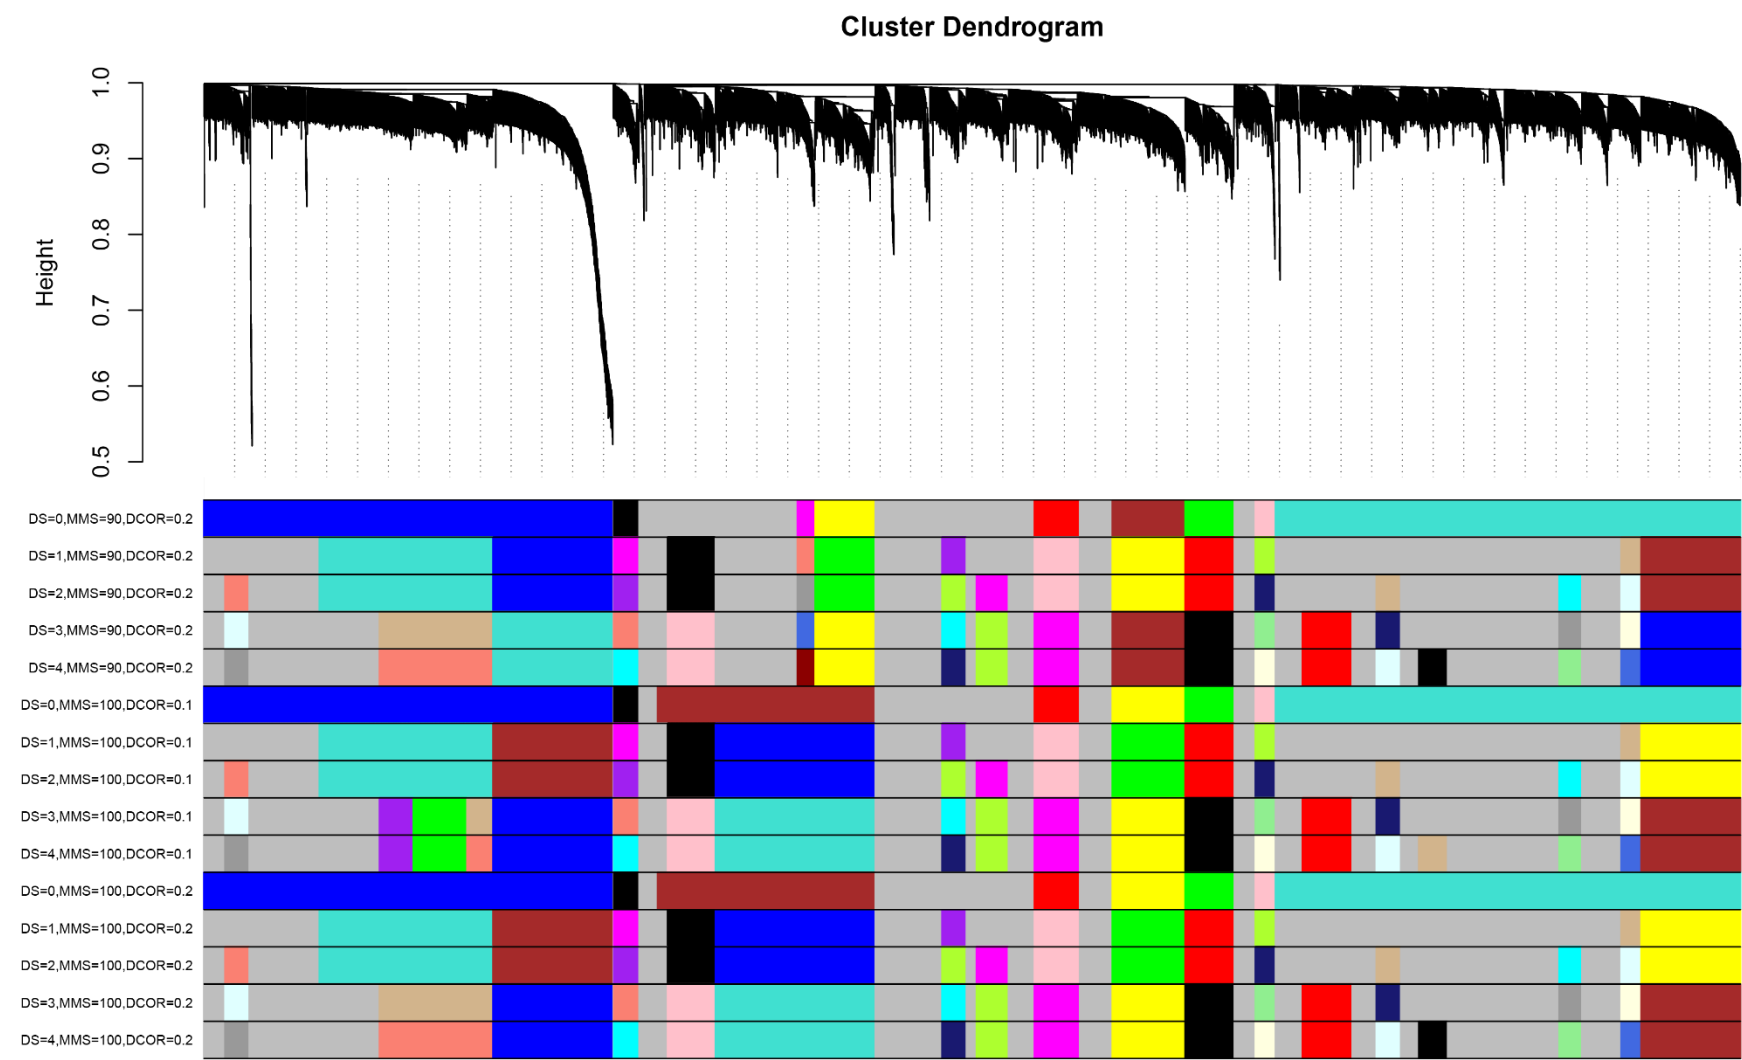

Supplementary Figure S5. Selection of parameters for the construction of module (ACS)

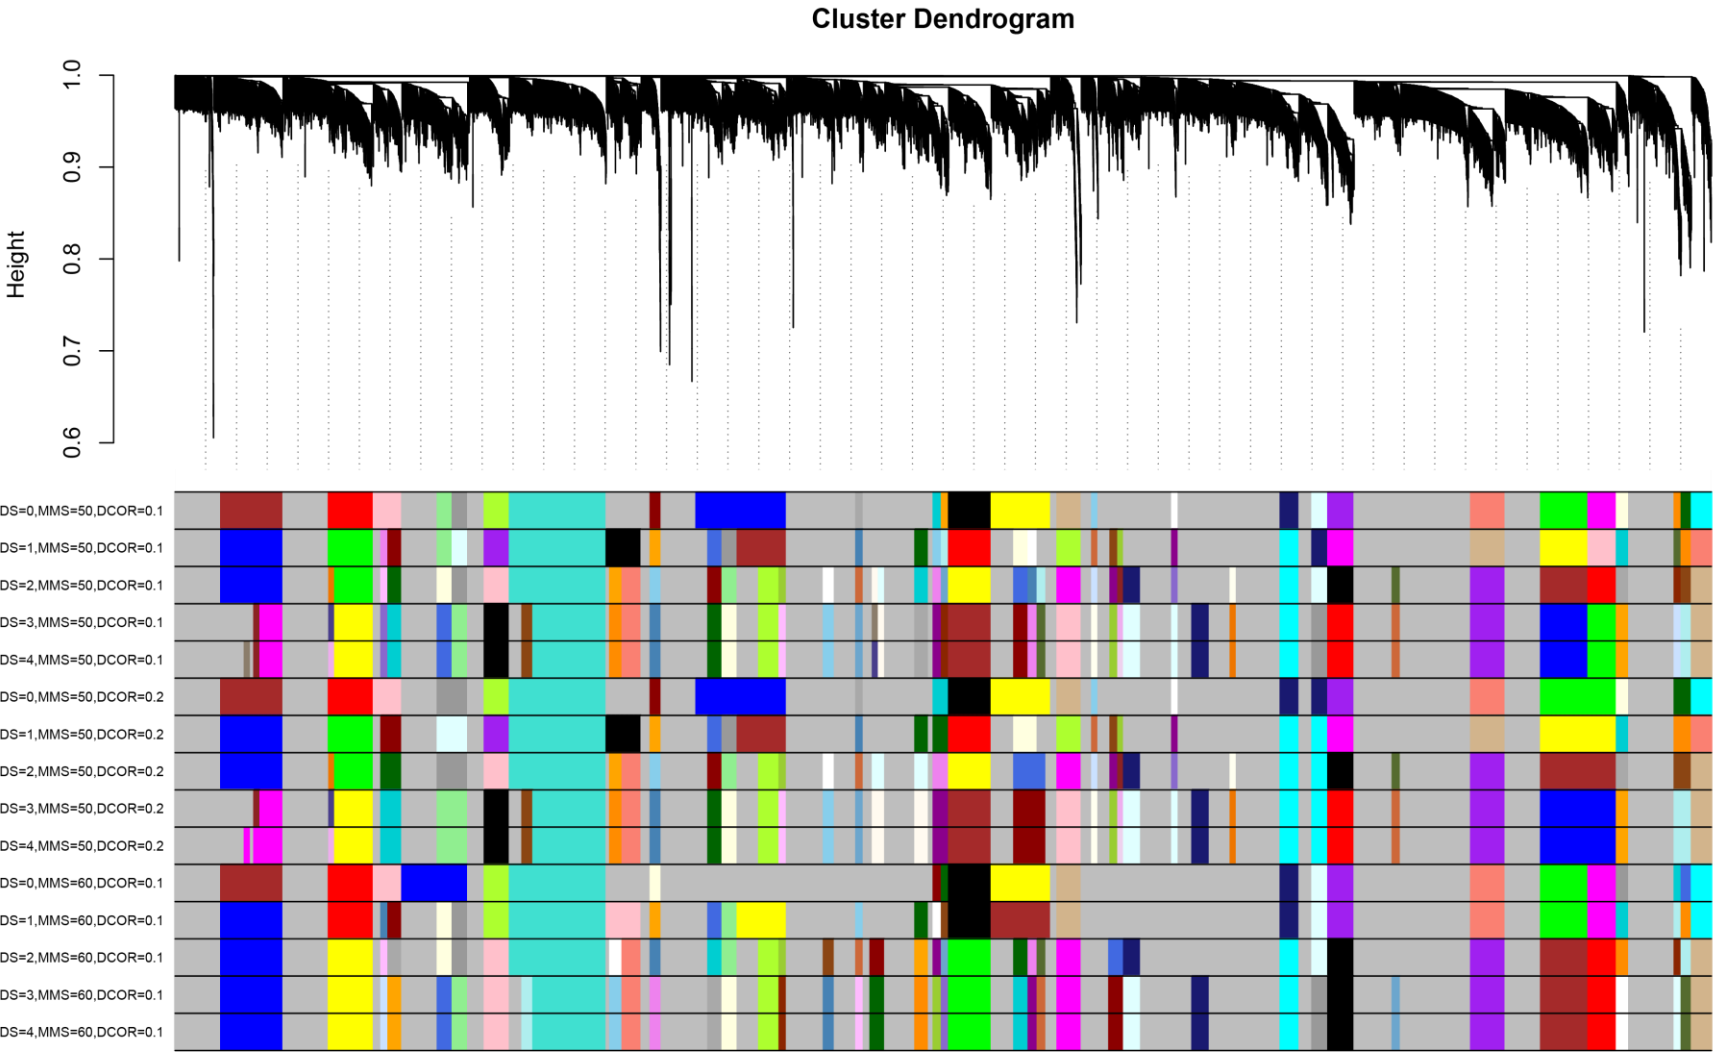

Supplementary Figure S5. Selection of parameters for the construction of module (ACS, Continued)

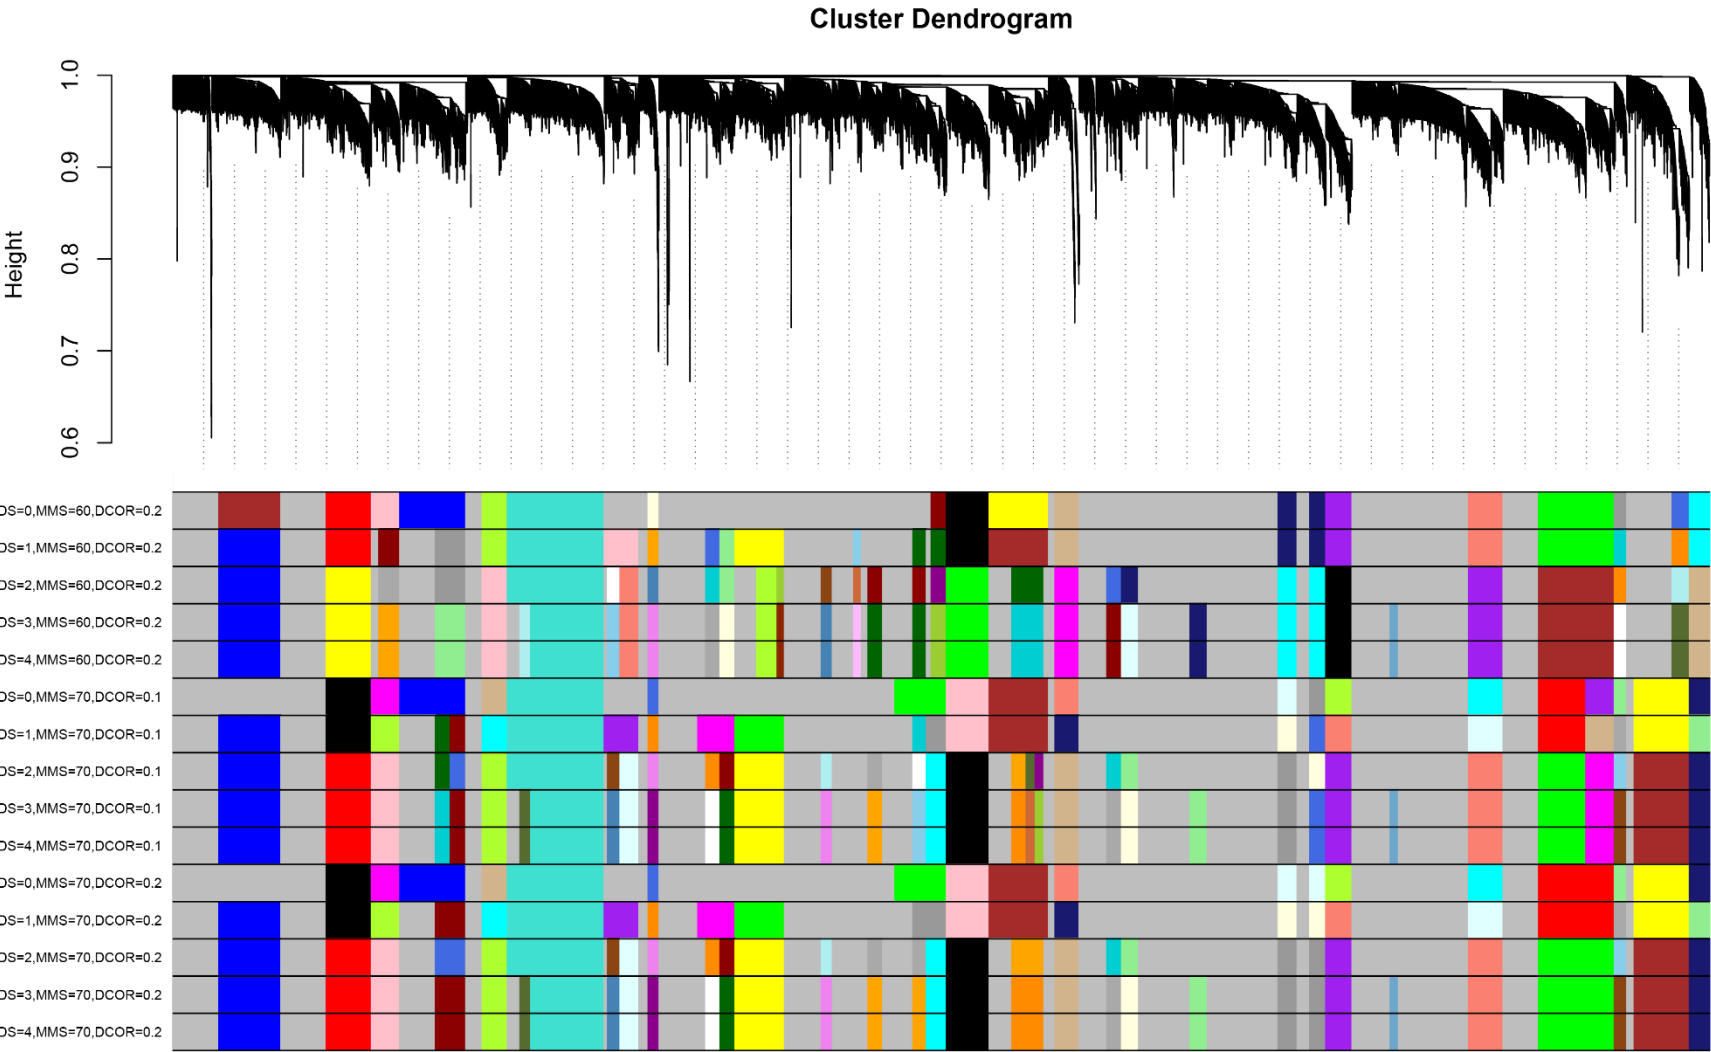

Supplementary Figure S5. Selection of parameters for the construction of module (ACS, Continued)

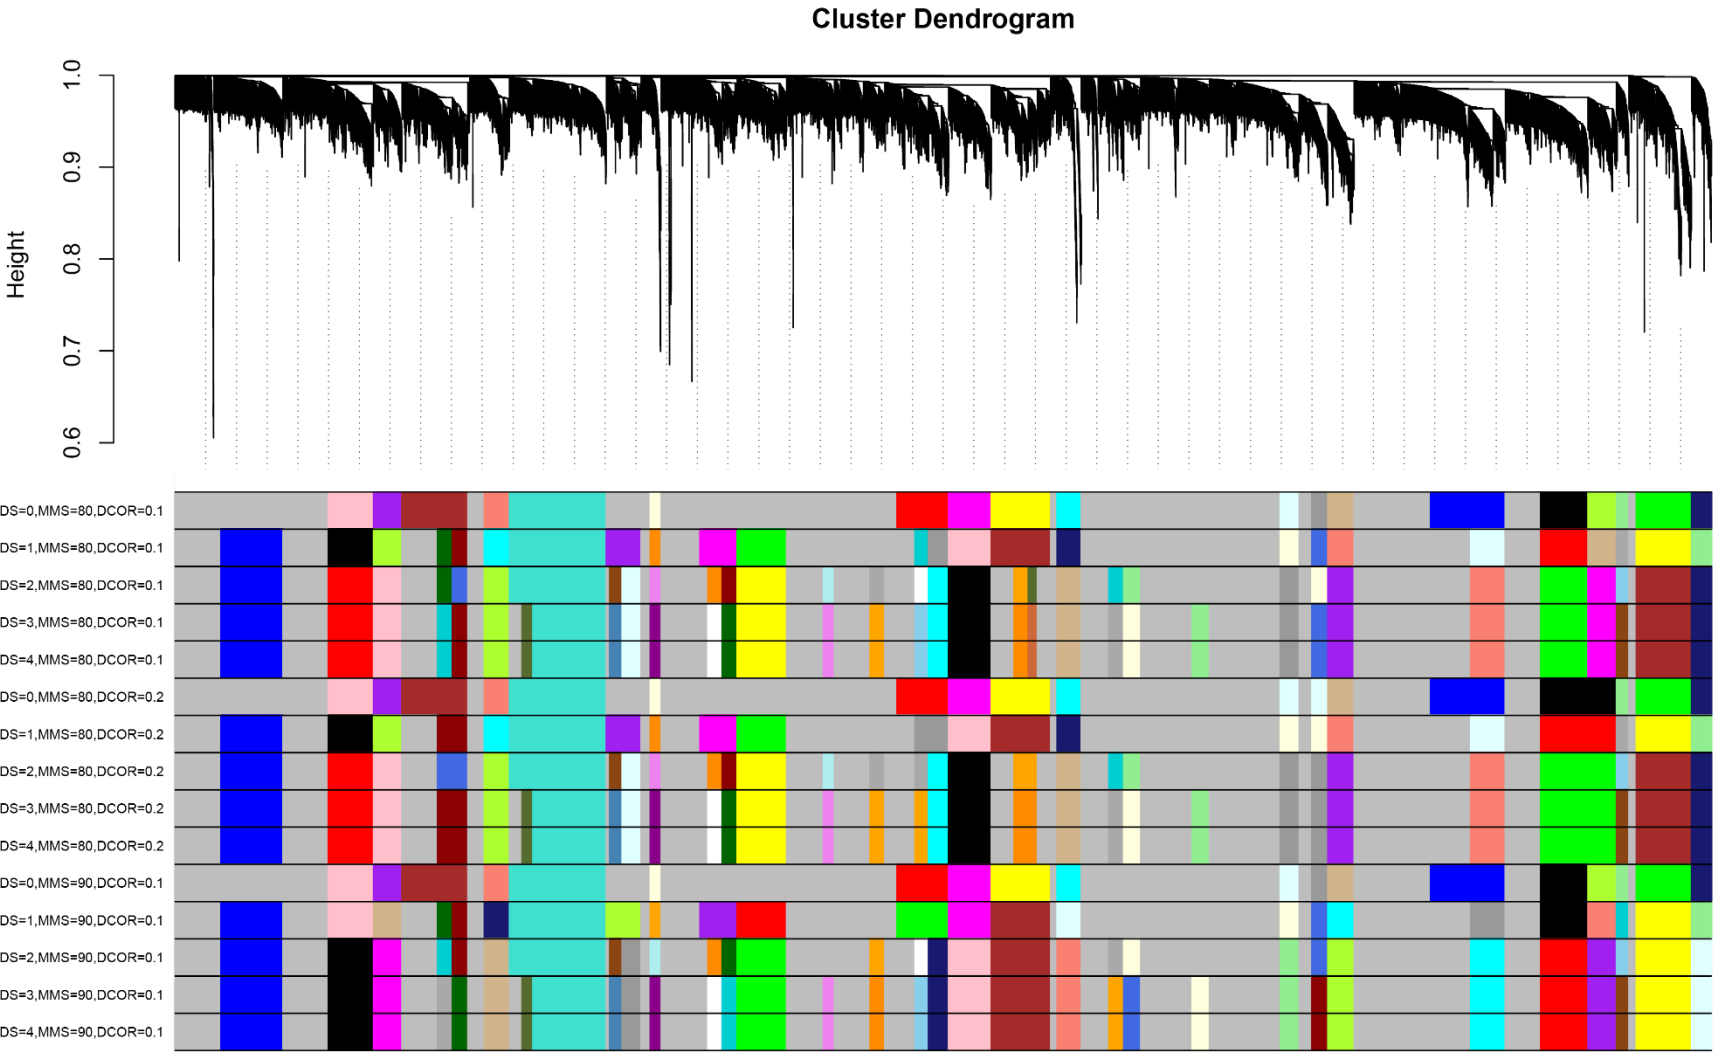

Supplementary Figure S5. Selection of parameters for the construction of module (ACS, Continued)

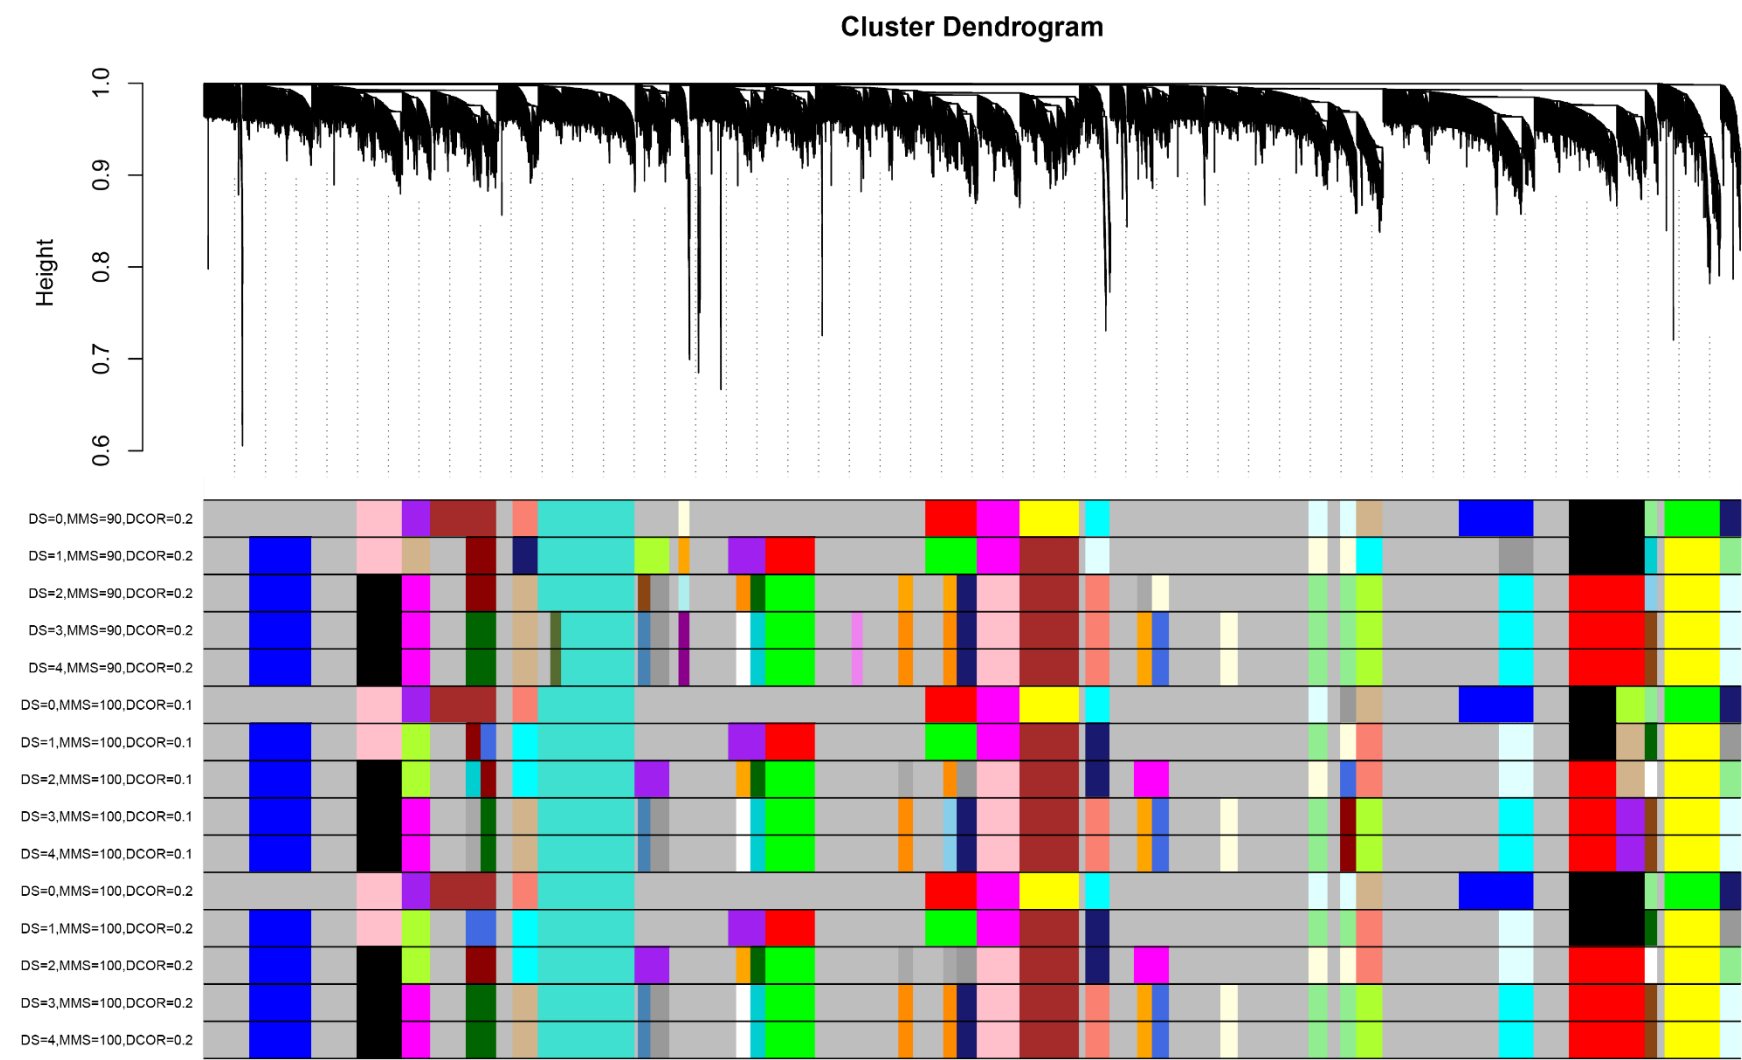

**Supplementary Figure S6.** Obstructive CAD-related modules selection based on the differential expression analysis.

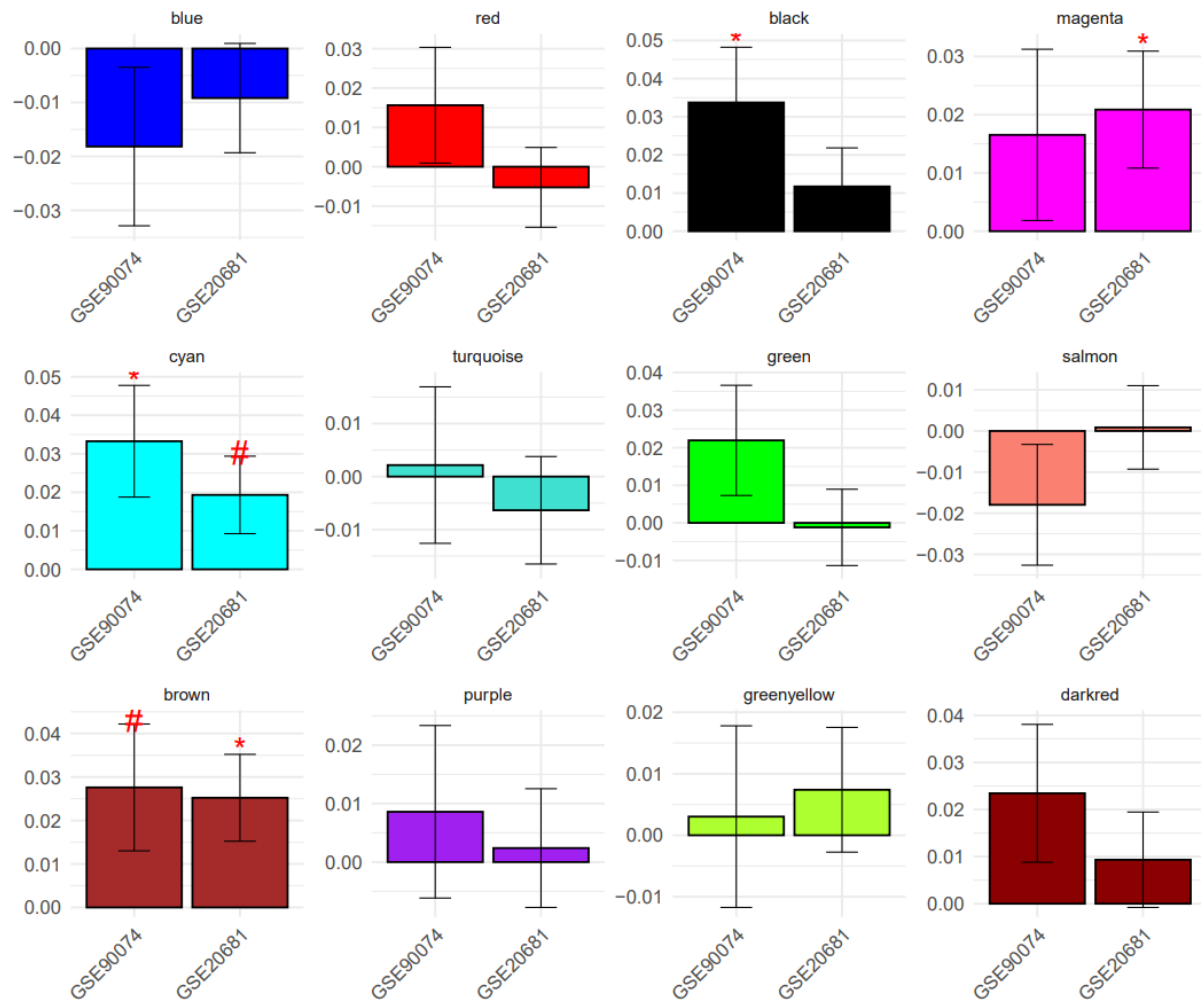

**Supplementary Figure S6.** Obstructive CAD-related modules selection based on the differential expression analysis (continued).

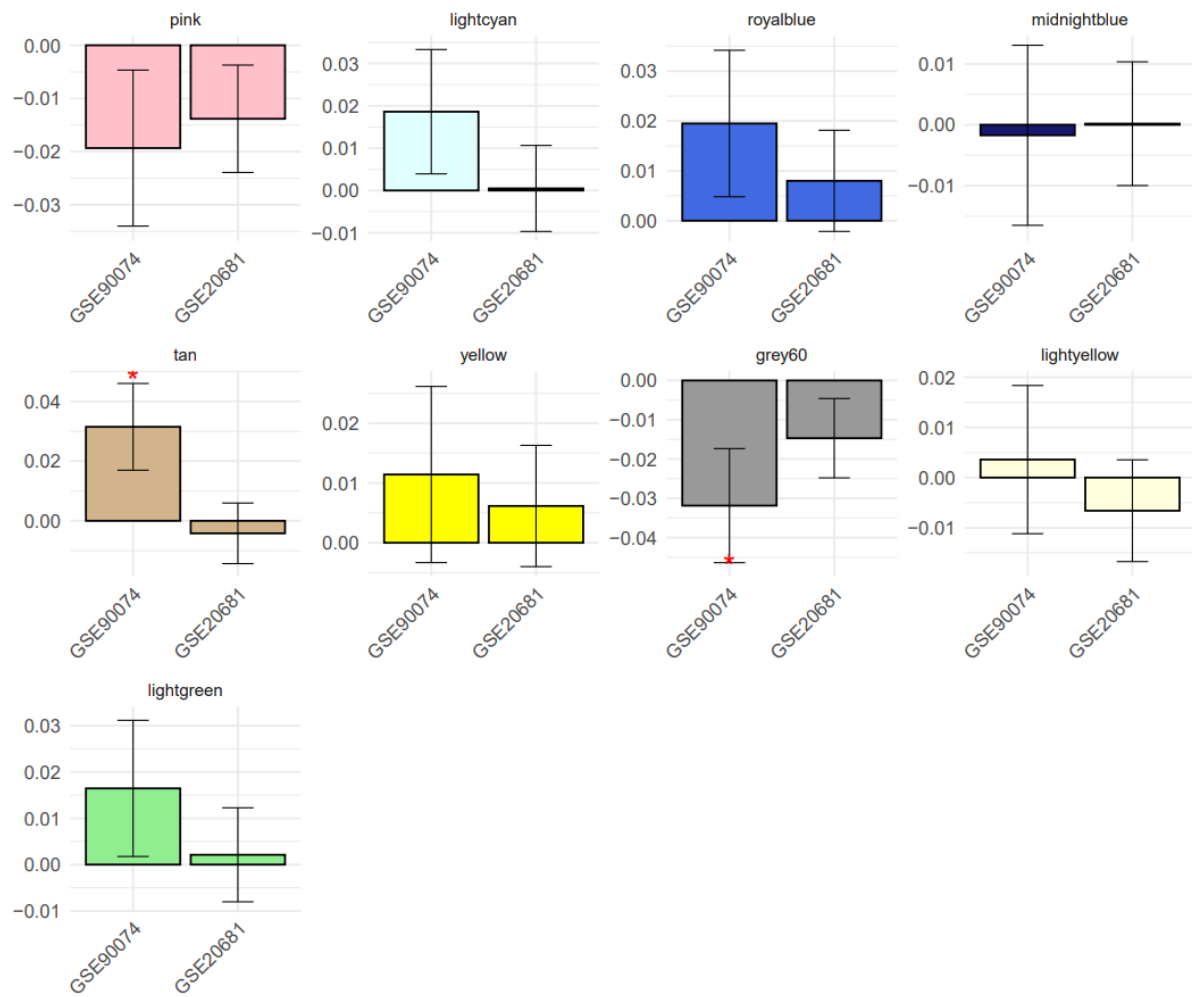

**Supplementary Figure S7.** ACS-related modules selection based on the differential expression analysis.

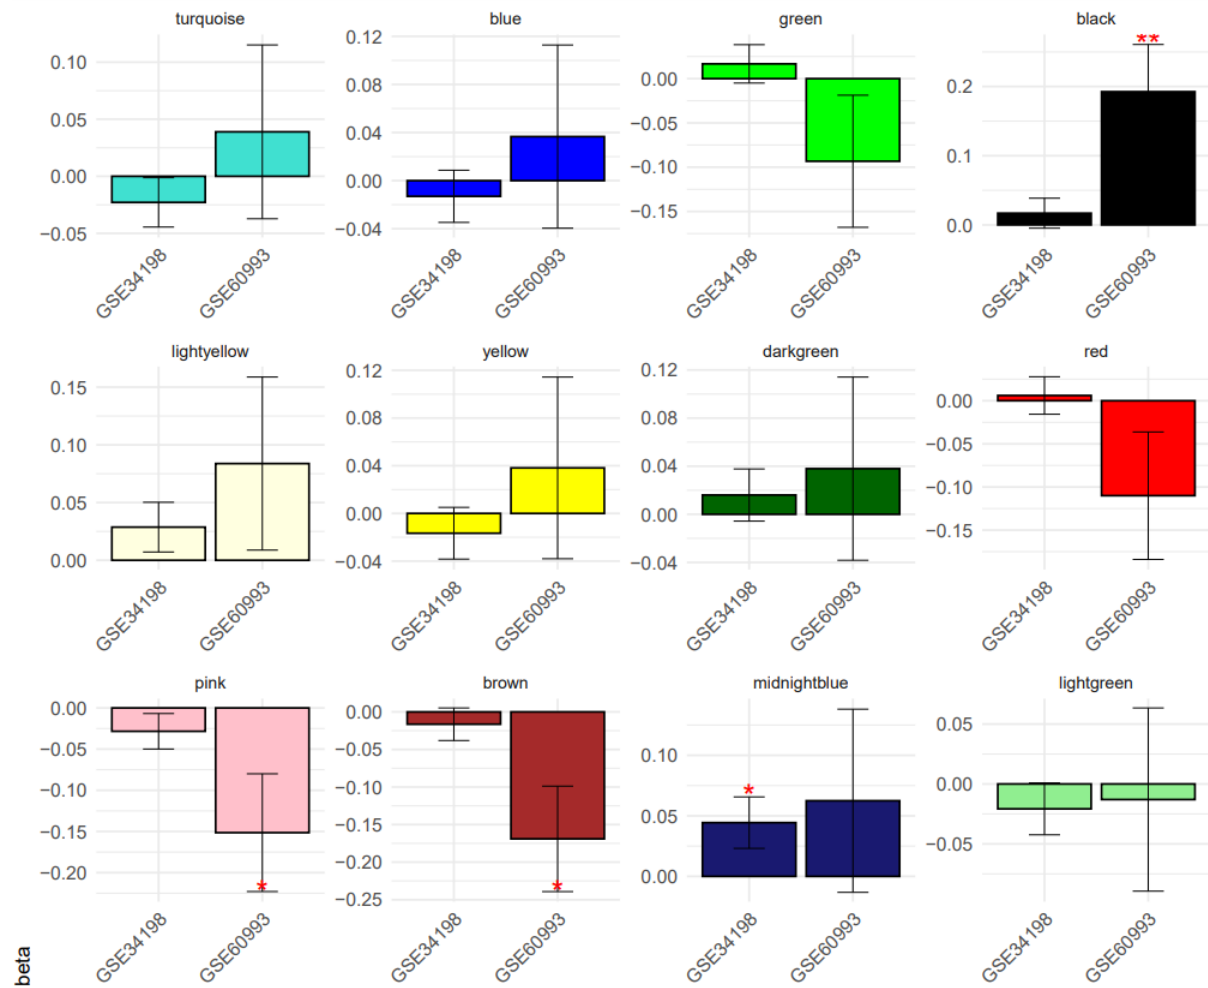



**Supplementary Figure S7.** ACS-related modules selection based on the differential expression analysis (continued).

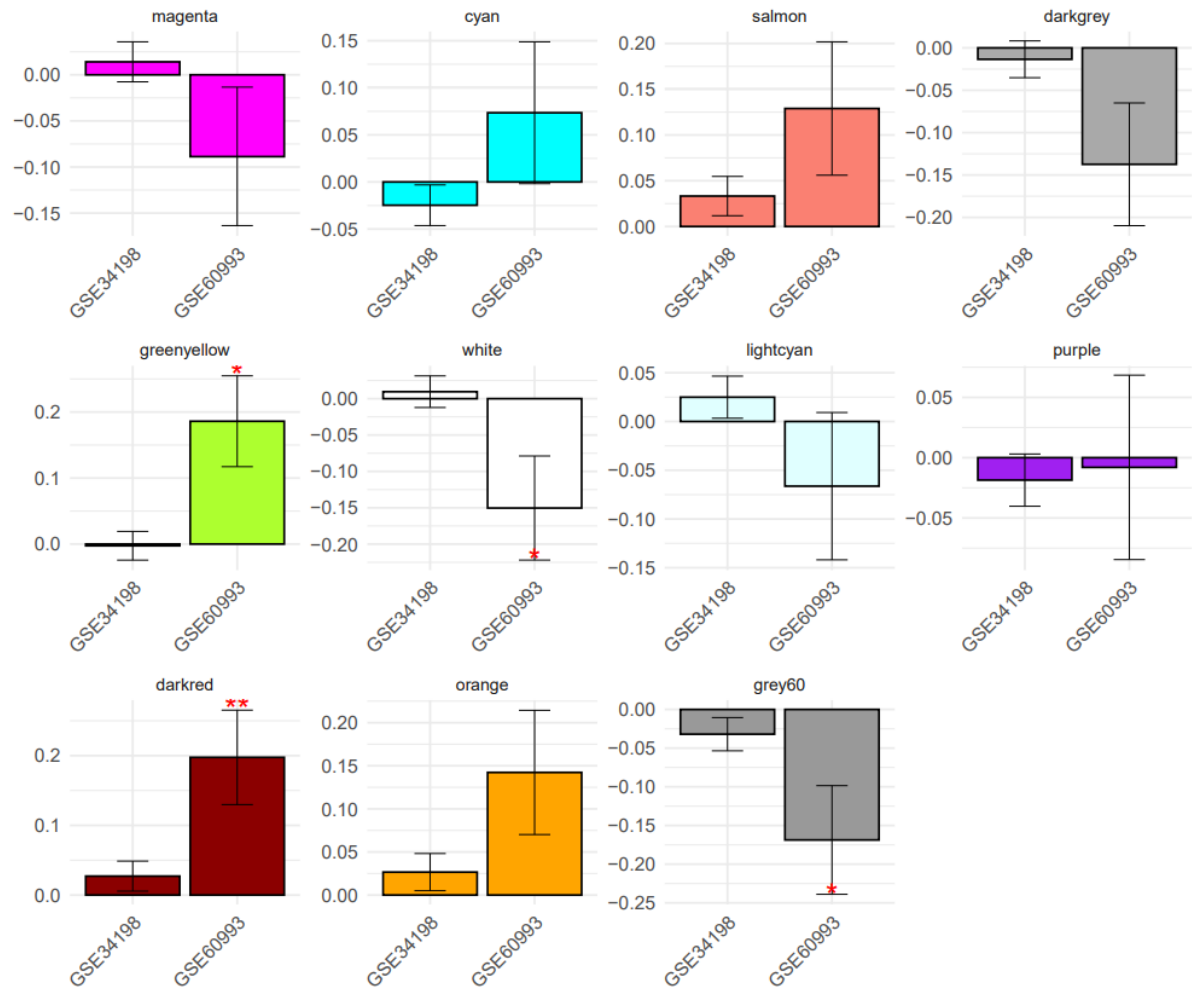

**Supplementary Figure S8.** Module selection based on the differential co-expression analysis.

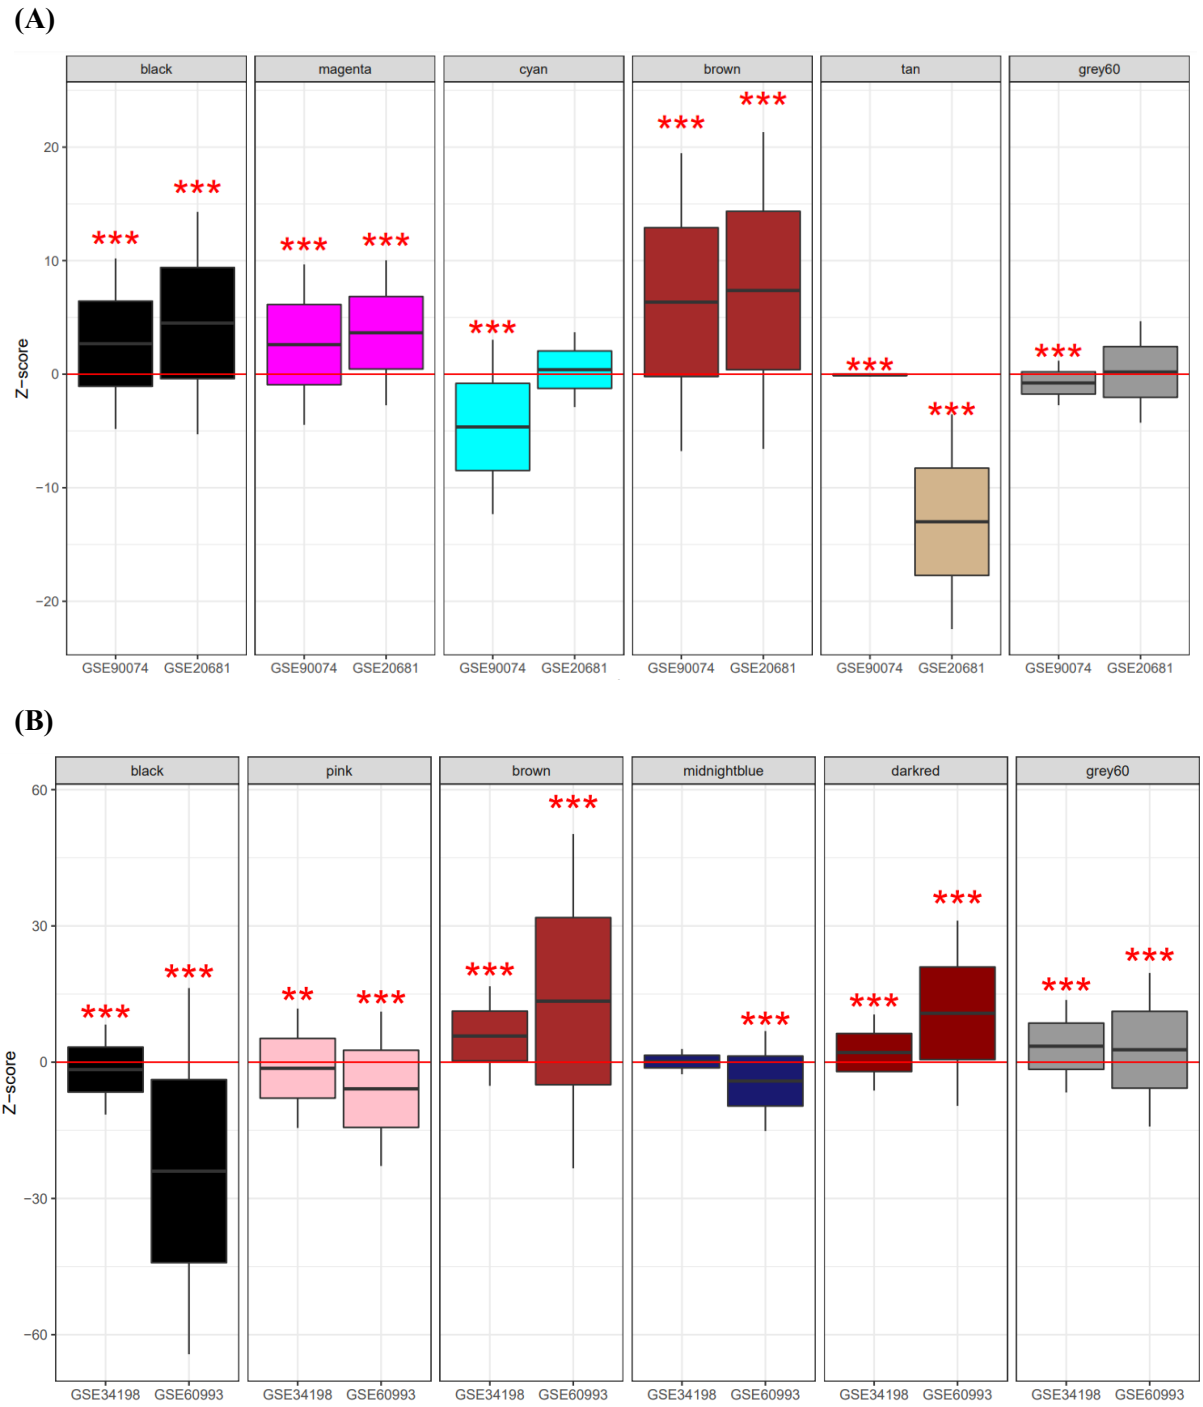

**Supplementary Table S1.** Summarization of human and mouse transcriptomic dataset.

| Datasets  | Study design                                                                                        | # of disease group | # of matched control | # of transcripts, probes, and probe-sets |
|-----------|-----------------------------------------------------------------------------------------------------|--------------------|----------------------|------------------------------------------|
| GSE90074  | Obstructive CAD vs. non-obstructive CAD                                                             | 93                 | 50                   | 41,093                                   |
| GSE20681  | Obstructive CAD vs. non-obstructive CAD                                                             | 99                 | 99                   | 45,015                                   |
| GSE34198  | ACS vs. non-ACS                                                                                     | 45                 | 48                   | 48,701                                   |
| GSE60993  | ACS vs. non-ACS                                                                                     | 26                 | 7                    | 48,803                                   |
| GSE59867  | ACS vs. non-ACS                                                                                     | 111                | 46                   | 33,297                                   |
| GSE4648   | ACS vs. Sham                                                                                        | 36                 | 24                   | 12,488                                   |
| GSE49937  | SR-BI <sup>-/-</sup> /apoE <sup>-/-</sup> (dKO) vs. SR-BI <sup>+/-</sup> /apoE <sup>-/-</sup> (HET) | 32                 | 28                   | 12,488                                   |
| GSE153485 | ACS vs. Sham                                                                                        | 10                 | 10                   | 21,838                                   |
| GSE775    | ACS vs. Sham                                                                                        | 18                 | 18                   | 12,488                                   |

**Supplementary Table S2.** Number of transcripts, probe, or probe-sets in three blood gene expression datasets according to pre-processing steps.

| <b>Preprocessing Step</b>                                                                      | <b>GSE90074</b> | <b>GSE20681</b> | <b>GSE34198</b> | <b>GSE60993</b> |
|------------------------------------------------------------------------------------------------|-----------------|-----------------|-----------------|-----------------|
| <b>Original datasets</b>                                                                       | 41,093          | 45,015          | 48,701          | 48,803          |
| <b>Removing transcripts, probes, or probe-sets without Entrez-ID</b>                           | 30,936          | 32,696          | 30,541          | 35,962          |
| <b>Removing 40% of transcripts, probes, or probe-sets based on low variance across samples</b> | 18,561          | 19,617          | 18,324          | 21,577          |
| <b>Gene (Entrez-ID)-based selection of transcripts</b>                                         | 12,598          | 12,867          | 17,823          | 16,322          |

**Supplementary Table S3. Genes in turquoise and yellow modules**

| Black module                                                                                                                                                                                                                                                                                                                                                                                                                                                                                                                                                                                                                                                                                                                                                                                                                                                                                                                                                                                                                                                                                                                                                                                                                                                                                                                                                                                                                                                                                                                                                                                                                                                                                                                                                                                                                                                                                                                                                                                                                                                                                                                                                                                                                                                                                                                                                                                                                                                                                                                                                                                                                                                                                                                                                                                                                                                                                                                                                                                |
|---------------------------------------------------------------------------------------------------------------------------------------------------------------------------------------------------------------------------------------------------------------------------------------------------------------------------------------------------------------------------------------------------------------------------------------------------------------------------------------------------------------------------------------------------------------------------------------------------------------------------------------------------------------------------------------------------------------------------------------------------------------------------------------------------------------------------------------------------------------------------------------------------------------------------------------------------------------------------------------------------------------------------------------------------------------------------------------------------------------------------------------------------------------------------------------------------------------------------------------------------------------------------------------------------------------------------------------------------------------------------------------------------------------------------------------------------------------------------------------------------------------------------------------------------------------------------------------------------------------------------------------------------------------------------------------------------------------------------------------------------------------------------------------------------------------------------------------------------------------------------------------------------------------------------------------------------------------------------------------------------------------------------------------------------------------------------------------------------------------------------------------------------------------------------------------------------------------------------------------------------------------------------------------------------------------------------------------------------------------------------------------------------------------------------------------------------------------------------------------------------------------------------------------------------------------------------------------------------------------------------------------------------------------------------------------------------------------------------------------------------------------------------------------------------------------------------------------------------------------------------------------------------------------------------------------------------------------------------------------------|
| <p>ABHD18, ABI1, ACTB, ACTG1, ADAM17, AFF1, AIDA, AKTIP, AMACR, ANKRD10, AP3S1, ARCNI, ARFGAP3, ARHGAP1, ARHGEF2, ARID4A, ARNT, ATF1, ATP6V1B2, ATP6V1G1, ATP8B5P, BAZ2A, BEX4, BICRAL, BRD2, BTG1, C18orf25, C1orf52, C1orf56, C2orf68, C7orf25, C9orf72, CALM2, CAP1, CAPZA1, CAPZA2, CARD8, CCDC28A, CCNG2, CDC42SE1, CDC73, CDS2, CEMIP2, CHMP1B, CHUK, CLK1, CLP1, CNBP, CNEPIR1, COG3, COIL, COTL1, CPOX, CRADD, CRK, CTCF, CTDSP2, CTSS, CUTC, CWC22, CWF19L1, CYB5B, CYTH1, DDX5, DDX59, DEGS1, DENND5A, DGCR2, DHRS7, DNAJA1, DNAJB6, DR1, DTX3L, DUSP11, EAF1, EDEM1, EDEM2, EIF1, ELOVL5, EPG5, ERI1, EXOC1, EXOC5, EYA3, F2RL1, F8A1, FAM120AOS, FAM91A1, FBXL12, FBXO3, FMR1, FOS, GADD45A, GET1, GID8, GLE1, GLUL, GMCL1, GNB1, GPBP1L1, HMGN2, HMGN2P46, HNRNPCL1, HNRNPPL, HSPA5, IDI1, IER2, ILKAP, INO80C, IST1, ITPR2, KANSL2, KBTBD2, KCTD18, KDELR2, KDM2A, KDM3A, KLF2, KMT5B, KRCC1, LAMP1, LASP1, LATS2, LOC643454, LRRC42, LYRM1, MAML1, MAPK9, MARCHF5, MARCHF7, MCL1, MED23, MED8, MFS14A, MOB1A, MORF4L1, MR1, MRFAP1, MRFAP1L1, MTM1, MTMR12, MYCBP, NBP1F1, NBP1F4, NPTN, NSL1, NT5C2, OAZ1, OGT, PAFAH1B2, PAIP2, PAN3, PAPSS1, PCBP1, PDE4B, PDE6D, PELI2, PEX13, PICALM, PIK3CA, PLEKHB2, PPP1R10, PPP2CA, PPP4C, PPP4R2, PPP6R3, PRDM2, PRDM4, PRUNE1, PSMD5, RAB1A, RAB21, RAB5A, RAB8A, RAD23B, RALB, RALBP1, RANBP9, RAPIA, RAP2C, RARA, RBM33, RBMX2, RMI1, RNF122, RNF146, RNF20, RRAGC, RTF1, RUNX2, SAFB, SAMSNI, SARAF, SBN01, SDHC, SEC22B, SELENOT, SETD3, SF3B1, SIAH1, SLC35A5, SLC35B3, SLC35F5, SLF2, SMAD2, SMAD4, SMARCA2, SMIM14, SNAP23, SPG21, SPIDR, SRF, SRGAP2C, STAG1, STAMB, STAT5A, STK24, STYXL1, SUDS3, SUMO1, TAB2, TANK, TCF20, TLE3, TMBIM4, TMBIM6, TMED7, TMEM165, TMEM248, TMEM50A, TNRC6B, TOP1, TOP1P2, TOR1A, TOR1AIP1, TUBGCP3, TVP23C, TXNDC12, TXNRD1, UBA3, UBE2G1, UBE2J1, UBR5, UHRF1BP1L, UPF2, VBP1, VEZF1, VMP1, VPS41, VPS4B, VTA1, WTAP, XRN2, YTHDF3, YWHAH, ZFP91, ZNF141, ZNF200, ZNF230, ZNF267, ZNF274, ZNF586, ZNF678, ZNF728, ZNF776, ZSCAN32</p>                                                                                                                                                                                                                                                                                                                                                                                                                                                                                                                                                                                                                                                                                                                                                                                                                                                                                                                                                   |
| Magenta module                                                                                                                                                                                                                                                                                                                                                                                                                                                                                                                                                                                                                                                                                                                                                                                                                                                                                                                                                                                                                                                                                                                                                                                                                                                                                                                                                                                                                                                                                                                                                                                                                                                                                                                                                                                                                                                                                                                                                                                                                                                                                                                                                                                                                                                                                                                                                                                                                                                                                                                                                                                                                                                                                                                                                                                                                                                                                                                                                                              |
| <p>ABCA1, ACOX1, ACSL4, AGFG1, AGTPBP1, AHCTF1, AMD1, AMN1, ANP32A, ARG1, ARHGAP15, ARHGAP19, ARHGAP26, ARPC3, ATP6V1A, ATP6V1C1, AVIL, AZIN1, B3GNT5, BACH1, BASP1, BAZ2B, BEND7, BNIP2, C18orf32, CCDC153, CCPG1, CD302, CDH26, CDK14, CDKL5, CEP19, CFAP92, CHD7, CHMP2A, CHRNA10, COP1, CPD, CPEB4, CPPED1, CREB5, CREBBP, CRISPLD2, CXCR4, CYB5R4, CYP4F3, DACH1, DCP2, DCTN4, DHRS12, DHRSX, DRC1, DYNCL1L1, EGLN1, ENTPD1, ERGIC1, ERLIN1, ERO1A, EVI2A, F5, FAM120A, FAM126B, FAM209A, FAM8A1, FAR1, FBXL5, FBXO30, FBXO33, FBXO38, FCHO2, FGGY, FHIP2A, FNDCC3B, GAB1, GALNT7, GCA, GDAP2, GK, GPAT3, H3C1, H3C11, H3C15, H3C4, HBP1, HCG27, HDAC4, HECW2, HHEX, HNRNP2, HSD17B11, HSDL2, IFNAR1, IFNGR1, IFRD1, IKBIP, IL1RAP, INHBB, IP6K1, IQGAP1, IRAG2, IRS2, KATNBL1, KBTBD7, KCNE3, KDM5B, KIAA0232, KIAA0319, KIF13A, KIT, KLF5, KLHL2, KLHL8, LCOR, LIN7A, LMBRD1, LMNB1, LPCAT2, LRRC4, LRRK2, LXN, LY96, MAP2K6, MAP3K2, MMADHC, MSL3, MSL3P1, MSRB2, MTMR6, MVP, NFE2L2, NHS, NIN, NPEPPS, NQO2, NRDC, NSUN7, NUFIP2, NUP58, OPLAH, ORM1, ORM2, OSBPL1A, OSBPL8, PACSIN2, PARP8, PCMTD2, PDZD8, PELI1, PHLPP1, PIP4P2, PJA2, PLAGL1, PLXNC1, PPP2R2A, PRCP, PRKAR1A, PTBP3, PTGS2, PYGL, QKI, RAB32, RAB36, RAD21, RB1CC1, RBM47, RBP7, RBPJ, RCOR1, REPS2, RESF1, RGL3, RHOA, RICTOR, RILPL1, RIPOR2, RNASEL, RNF103, RNF111, RNF13, RPGR, RPS6KA5, RRM2B, RYBP, SEPTIN14, SERPINB1, SH3GLB1, SHOC2, SLC12A6, SLC16A3, SLC19A1, SLC22A15, SLC22A4, SLC26A8, SLC37A3, SLC40A1, SNX10, SNX18, SOS2, SPI, SPOPL, SRGN, ST3GAL6, ST6GALNAC3, STAM2, STK38L, STX10, STX3, SULT1B1, SYNJ1, TET2, THBD, TIMP2, TKT, TLE4, TLR1, TLR4, TLR6, TMEM33, TMEM59, TMEM71, TMEM88, TMLHE, TNNT2, TRIQK, TUT7, TXN, UBE2W, UBXN2B, UGGT1, USP10, VAMP3, VNN2, VNN3P, VPS8, WDFY3, WIPF2, YIPF4, YPEL5, ZBTB34, ZFAS1, ZFP36L1, ZFYVE16, ZMPSTE24, ZNF281, ZSWIM6</p>                                                                                                                                                                                                                                                                                                                                                                                                                                                                                                                                                                                                                                                                                                                                                                                                                                                                                                                                                                                                                                                                                                                 |
| Brown module                                                                                                                                                                                                                                                                                                                                                                                                                                                                                                                                                                                                                                                                                                                                                                                                                                                                                                                                                                                                                                                                                                                                                                                                                                                                                                                                                                                                                                                                                                                                                                                                                                                                                                                                                                                                                                                                                                                                                                                                                                                                                                                                                                                                                                                                                                                                                                                                                                                                                                                                                                                                                                                                                                                                                                                                                                                                                                                                                                                |
| <p>AATK, ABCG1, ABHD2, ABHD3, ABHD5, ACSL1, ACSL3, ADAM10, ADAM8, ADAM9, ADM, AGO4, AKIRIN1, AKIRIN2, ANKRD13A, ANKS1A, ANO10, ANXA3, AOC3, APAF1, APBB1IP, APMAP, APPL2, AREL1, ARHGEF40, ARL8A, ARPC5, ASPH, ASPRV1, ATF6, ATG16L2, ATP11A, ATP11B, ATP6V0E1, ATXN1, AVL9, B2M, B4GALT1, B4GALT5, B9D2, BASP1-AS1, BCL2A1, BCL3, BCL6, BMX, BRI3, BTBD10, C11orf54, C16orf72, C1RL, C3orf62, C4orf3, CAB39, CACUL1, CAMKK2, CARD6, CARS2, CASC3, CASP4, CCDC71L, CCNJL, CD55, CD58, CD59, CD63, CDC123, CDKN2D, CEBPB, CEBPD, CHIC2, CHP1, CHST15, CHSY1, CKAP4, CKLF, CLIP1, CMTM6, CNIH4, CNTNAP3, CORO1C, CPQ, CR1, CSGALNACT2, CTBP2, CTBS, CUL4B, CWC25, CXCL1, CYSTM1, DAZAP2, DCUN1D1, DDIT3, DENND10, DHTKD1, DICER1, DOK3, DPH3, DPH3P1, DPY19L3, DRAM1, DUSP1, DUSP13, E2F3, ECHDC3, ELL, EPOR, ETS2, ETV6, EXOC6, F11R, FADD, FAR2, FAS, FBRS, FBXL13, FCAR, FGD4, FKBP5, FRAT2, FTH1, GABARAPL1, GABARAPL3, GALNT14, GMFG, GMPR2, GNAI3, GNG10, GNG5, GNS, GPER1, GPR160, GPR27, GRB10, GTF2I, GYG1, H2AZ1, H3-3A, H3-3B, H3-4, H3-5, H3C13, H3C2, H3C3, H3C8, HAL, HAUS4, HCLSL1, HEBP2, HINT3, HK2, HMGB2, HSPA1A, HTATIP2, IFNGR2, IGF1R, IGF2R, IL13RA1, IL1R1, IL4R, IMPDH1, ING1, INPP5A, IRAK3, ITPRID2, JDP2, JPT1, JUNB, KCNE1, KCNJ2-AS1, KDM3B, KIF1B, KLF7, KLHL12, KLHL21, KPNB1, KREMEN1, KRT23, LAMP2, LAMTOR3, LAMTOR5, LAT2, LBR, LCP1, LIMK2, LINC01000, LPGAT1, LRRFIP2, LRRN1, MAEA, MAK, MAN2A2, MANSC1, MAP2K4, MAP3K3, MAP3K5, MAP4K4, MAPK1, MAPK14, MARCKS, MBOAT2, MCTP2, MEGF9, METTL9, MFN2, MFS14B, MGRN1, MINDY1, MKNK2, MLX, MME, MMP9, MPZL1, MPZL3, MSL1, MSRA, MSRB3, MTARC1, MTFMT, MTHFS, MTMR3, MXD1, MYL12A, MYL12B, MYL6, MYLIP, NABP1, NACC2, NAMPT, NDUFB3, NEDD9, NFE4, NFIL3, NFKBIA, NIBAN1, NIPBL, NLRX1, NOL4L, NOP10, NOTCH2, NRBF2, NSMAF, NUAKE2, NUDT5, NUMB, OAT, OSBPL2, OSER1, OSGIN2, OSTF1, OXSR1, PDK3, PHF21A, PHTF1, PIGX, PIM3, PITPNA, PLAUR, PLBD1, POLD3, PPFA1, PPIA51, PPP1R12B, PPP1R3B, PPP2R5A, PPP3CA, PPP4R1, PREX1, PRKDC, PRR13, PSEN1, PSMB3, PSMD4, PTP4A1, PTPRJ, PTTG1IP, QPCT, QSOX1, RAB11FIP1, RAB18, RAB27A, RAB2A, RAB31, RAB3D, RAB43, RAB5IF, RALGAP2, RASSF2, RFLNB, RGS2, RILPL2, RIT1, RLIM, RNF130, RNF144B, RNF149, ROPN1L, RRAGD, RTN4, S100A6, S100P, SAT1, SCYL1, SDCBP, SERTAD3, SFT2D1, SIPA1L2, SIRPA, SKAP2, SLA, SLC12A9, SLC15A4, SLC16A5, SLC25A44, SLC2A14, SLC2A3, SLC31A2, SLC38A2, SLC43A2, SLC49A4, SLC6A6, SLC8A1, SLC04C1, SMCHD1, SNX13, SNX27, SOCS3, SOD2, SORL1, SORT1, SPAG9, SQOR, SRPK1, SSH3, ST6GALNAC2, STEAP4, STK17B, STK40, STX11, STX6, STXBP5, SUSU6, SVIL, TADA3, TALDO1, TBC1D14, TDP2, TECPR2, TESMIN, TGFA, THEMIS2, TM9SF2, TMC03, TMEM127, TMEM167A, TMEM184B, TMEM185B, TMEM30A, TMEM43, TMEM45B, TMEM65, TMX4, TP53INP2, TPD52L2, TPST1, TRIM8, TSEN34, TSHZ3, TUBA4A, U2AF1, UBALD2, UBE2R2, UBL5, UBR2, UIMC1, ULK1, UPF1, USB1, USP3, USP6, USP9X, VAPA, VCPKMT, VIM, WAC, WIP1, WLS, WWC3, YIPF1, ZDHHC3, ZNF438, ZNF516, ZNF746, ZXDC</p> |

**Supplementary Table S4.** Genes in turquoise and yellow modules

| Pink module                                                                                                                                                                                                                                                                                                                                                                                                                                                                                                                                                                                                                                                                                                                                                                                                                                                                                                                                                                                                                                                                                                                                                                                                                                                                                                                                                                                                                                                                                                                                                                                                                                                                                                                                                                                                                                                                                                                                                                                                                                                                                                                                                                                                                                                                                                                                                                                                                                                                                                                                                                                                                                                                                                                                                                                                                               |
|-------------------------------------------------------------------------------------------------------------------------------------------------------------------------------------------------------------------------------------------------------------------------------------------------------------------------------------------------------------------------------------------------------------------------------------------------------------------------------------------------------------------------------------------------------------------------------------------------------------------------------------------------------------------------------------------------------------------------------------------------------------------------------------------------------------------------------------------------------------------------------------------------------------------------------------------------------------------------------------------------------------------------------------------------------------------------------------------------------------------------------------------------------------------------------------------------------------------------------------------------------------------------------------------------------------------------------------------------------------------------------------------------------------------------------------------------------------------------------------------------------------------------------------------------------------------------------------------------------------------------------------------------------------------------------------------------------------------------------------------------------------------------------------------------------------------------------------------------------------------------------------------------------------------------------------------------------------------------------------------------------------------------------------------------------------------------------------------------------------------------------------------------------------------------------------------------------------------------------------------------------------------------------------------------------------------------------------------------------------------------------------------------------------------------------------------------------------------------------------------------------------------------------------------------------------------------------------------------------------------------------------------------------------------------------------------------------------------------------------------------------------------------------------------------------------------------------------------|
| <p>ABCF1, ABHD10, ABL1, ACO2, ACOT2, ACOT7, ADAM15, ADSL, AIMP2, AK2, AKR7A2, ALG3, ALKBH4, ALKBH6, ALKBH7, ANKMY1, ANKS3, AP4B1, AQR, ARFGAP2, ARHGAP17, ARHGEF19, ARL2, ARRDC1-AS1, ASPSCR1, ATF5, ATP5F1A, B4GALT7, BLOC1S4, BMS1, BOP1, BORCS6, BPHL, BRD9, BSCL2, BTBD11, C11orf24, C16orf91, C19orf12, C19orf44, C19orf48, C1orf50, C20orf27, C2CD2, C4orf48, CALM3, CAPS, CBR1, CBX6, CBY1, CCDC106, CCDC136, CCDC25, CCDC92, CCT2, CCT7, CD1C, CD320, CD7, CDC37, CDK9, CENPB, CENPX, CEP131, CES2, CLCN7, CLSTN1, CNDP2, CNOT11, COMT, COX4I1, CPSF1, CPSF3, CPSF4, CTC1, CTNS, CXXC1, DCXR, DDX19A, DDX51, DENND4C, DGCR6, DGCR6L, DGUOK, DHRS1, DMT1, DNAH1, DNAJC17, DNAJC8, DPAGT1, E2F6, E4F1, EBP, EC11, EDC4, EEF1D, EIF2B1, EIF2B4, EIF2B5, ELP6, EML3, ENO3, ERGIC3, ERI3, ETFB, EVI5L, EVL, EZR, FAAP100, FAAP20, FAM110A, FAM50A, FANCE, FASN, FBXL6, FDXR, FIBP, FKBP11, FKBP4, FLNB, FN3KRP, GALT, GATB, GATD1, GMDS, GNA11, GNL1, GPN2, GPS1, GTPBP6, HADHA, HARS1, HAUS7, HDAC1, HDAC11, HGH1, HIRIP3, HLA-DMA, HMCES, HNRNPC, HPS6, IL12RB1, ILKAP, JMJD7-PLA2G4B, JSRP1, KDM1A, KHSRP, KLHDC3, KLHL22, KPNA6, KRBA1, KRTCAP2, KYAT1, LAT, LHPP, LINC01089, LMNA, LOC653303, LRRC23, LRRC41, LRRC45, LTO1, MADD, MAGED2, MAN1B1, MED16, MED22, METTL16, MFE8, MFSD10, MFSD3, MPDU1, MPND, MRGBP, MRM3, MRPL37, MRPS16, MRPS18A, MRRF, MTFP1, MVB12A, MZF1, NACA, NAXE, NDRG2, NDUFS3, NDUFS7, NEK8, NFKBIE, NICN1, NMRAL1, NMT1, NOD1, NOLC1, NOP16, NOP2, NPRL2, NR2C2AP, NSDHL, NSMCE1, NSUN5P2, NT5C, NUDT1, NUP37, NUP42, NUP85, NVL, OSBP, OSGEP, PACSIN1, PAOX, PARP6, PCCB, PDCL3, PDIA4, PES1, PEX10, PEX11B, PEX16, PEX26, PGRMC2, PHB1, PHGDH, PHRF1, PI4KA, PIGU, PIH1D1, PLCH2, PLXND1, POLD2, POLE, POLG, POU2F2, PP1E, PPP1R35, PPP1R3E, PRMT7, PRPF19, PRR3, PRRT2, PSMB10, PSMC3, PSMD3, PSMD8, PTBP1, PUF60, PUS1, QARS1, R3HCC1, RABGGTA, RBFA, RBM4B, RCC2, REXO4, RHOC, RIPOR1, RITA1, RNF113A, RNF126, RP9, RPL32, RPS2P8, RRP36, RRP8, RUSC1, RUVBL1, SARS1, SAYSD1, SCARB1, SCMHI, SCNN1D, SCRIB, SDHAF1, SDR39U1, SERPINB6, SF3A3, SF3B2, SGF29, SH2B1, SHFL, SIL1, SLC25A10, SLC25A19, SLC25A26, SLC25A3, SLC27A3, SLC2A4RG, SLC2A8, SLC41A3, SLX9, SMARCA4, SNAPC2, SNAPC4, SNHG11, SNRPB, SNU13, SNX5, SPAG7, SPATA20, SPG7, SPHK2, SPNS1, SPOUT1, SRRM1, SSU72, STK36, TACO1, TAPBP1, TARBP2, TCF25, TDP1, TEDC1, TELO2, TEPSIN, TEX261, THEM6, TICAM1, TIGD5, TIMM22, TMED3, TMEM121, TMEM175, TMEM203, TMEM205, TNFRSF14, TNPO2, TOMM34, TP53I13, TRABD, TRAF3IP2, TRAPP4, TRIB3, TRMT1, TSPAN17, TSPAN18, TSPAN31, TSPAN32, TSSC4, TTC7A, TUBG1, TUBG2, TXLNA, TXNRD2, UBA7, UROS, USE1, UTP14A, VARS2, VPS16, WDR18, WDR70, WDR74, WDR83OS, WDR97, WRAP53, XBP1, YIF1A, YJU2B, ZBTB25, ZBTB3, ZDHHC16, ZNF142, ZNF212, ZNF296, ZNF317, ZNF34, ZNF358, ZNF511, ZNF622, ZNF777</p> |
| Darkred module                                                                                                                                                                                                                                                                                                                                                                                                                                                                                                                                                                                                                                                                                                                                                                                                                                                                                                                                                                                                                                                                                                                                                                                                                                                                                                                                                                                                                                                                                                                                                                                                                                                                                                                                                                                                                                                                                                                                                                                                                                                                                                                                                                                                                                                                                                                                                                                                                                                                                                                                                                                                                                                                                                                                                                                                                            |
| <p>ABHD5, ACOX1, ACSL1, ACTN1, ADM, AGO4, AGTPBP1, ALOX5AP, ANKS1A, ANTXR2, ANXA3, APMAP, AQP9, ARG1, ARHGEF40, ARID3A, ATP11B, ATXN1, AVIL, B4GALT5, BASP1, BCL6, BEST1, BMX, BRD8, BST1, BTBD10, C16orf72, C1RL, C3orf62, CAB39, CAMK2G, CBL, CCNJL, CCPG1, CD59, CEBPB, CHIC2, CHRNA10, CHST15, CLEC4D, CLEC4E, COP1, CPD, CREB5, CRISPLD2, CXCR2, CYRIA, DAPK2, DEF8, DNAJC25-GNG10, DNAJC3, DNTTIP1, DOCK5, DYNLT1, ECHDC3, EGLN1, ELF2, ELL, ERGIC1, ETS2, EVI2B, EXOC6, FADD, FAR2, FBXL13, FBXO38, FCGR3B, FHIP2A, FKBP5, FOS, FPR2, FRAT2, GAB2, GABARAPL1, GAS7, GBE1, GK, GPR141, H2BC4, H2BC6, HAL, HAUS4, HCG27, HECW2, HSDL2, HSPBAP1, HTATIP2, ICAM3, IFNAR1, IFNGR1, IFNGR2, IGF1R, IKBIP, IL13RA1, IL18R1, IL1R2, IRAK3, IRS2, ITPRIP, JPT1, KBTBD2, KCNJ15, KIAA0040, KIAA0232, KIAA0319, KIF1B, KLHL8, LAMP2, LAT2, LBR, LILRA2, LIN7A, LINC00921, LINC01191, LINC02649, LITAF, LMNB1, LPAR2, LPGAT1, LRRN1, LSMEM1, LY96, MAK, MAN2A2, MAP4K4, MAPK1, MBOAT1, MCEMP1, MGAM, MME, MMP25, MTARC1, MTHFS, MXD1, MYBPC3, NAMPT, NCF2, NDEL1, NEDD9, NFIL3, NIBAN1, NLRP12, NME8, NRBF2, NSMAF, NSUN7, ORM1, OSBPL1A, OSBPL2, OSER1, OSGIN2, OSM, P2RY13, PACSIN2, PADI4, PANX2, PDK3, PDZD8, PELI2, PFKFB3, PHF21A, PHTF1, PISD, PLBD1, PLXDC2, PPFIA1, PPP1R15A, PPP1R3D, PPP4R1, PROK2, PTEN, PXX, PYGL, QPCT, RAB2A, RAB31, RAB7A, RAF1, RALB, RASSF3, REM2, RFX2, RGL2, RILPL1, RIT1, RNF130, RNF144B, RNF149, RTN3, RUBCNL, S100A12, SAT1, SERPINB1, SIPA1L2, SIRPA, SKAP2, SLC12A6, SLC22A15, SLC22A4, SLC25A44, SLC26A8, SLC2A3, SLC31A2, SLC36A1, SLC37A3, SLC45A4, SLC49A4, SLC9A8, SPAG9, SPINK8, SRGN, SRPK1, SSH2, ST6GALNAC2, STK3, STX11, STX3, STX6, STXBP5, SULT1B1, SVIL, TBC1D14, TGFA, TLR2, TLR4, TLR5, TLR8, TM6SF1, TMCC3, TMCO3, TMEM185B, TMLHE, TMX4, TRIB1, TRIM25, TSHZ3, TXN, UBE2B, UBR2, UHRF1BP1L, USP10, USP4, VAV3, VCPKMT, VMPI1, VNN1, VNN2, VNN3P, VPS8, ZBTB34, ZFYVE16, ZNF20, ZNF438, ZNF516, ZNF746</p>                                                                                                                                                                                                                                                                                                                                                                                                                                                                                                                                                                                                                                                                                                                                                                                                                                                                           |
